# Supplementary material for: Disease Severity, Fever, Age, and Sex Correlate With SARS-CoV-2 Neutralizing Antibody Responses
Source: Front Immunol. 2021 Jan 29;11:628971. doi: 10.3389/fimmu.2020.628971 (PMC7878374; doi:10.3389/fimmu.2020.628971)
Supplement: Supplementary Data Sheet 3 — Predictive PO model for clinical data. This Excel file contains spreadsheets to calculate probabilities of high PRNT50 titers using a clinical vignette with four important variables as input. The first sheet provides a detailed description of how this may be used. In short, patient characteristics (sex, age, fever, anosmia/dysgeusia, and requirement for hospitalization) can be entered to calculate probabilities of higher PRNT50 titers in sheets for either of the categories “PRNT50>=320”, “PRNT50>=160”, “PRNT50>=80”, “PRNT50>=40”, or “PRNT50>=20”, respectively. For example, in “PRNT50>=320” an estimated probability higher than 0.1046 (for 95% target sensitivity) would qualify a sample for inclusion into further anti-SARS-CoV-2 S1-IgG ELISA screening or final plaque reduction neutralization testing. For demonstration purposes, sheets are prefilled with data from this study. [file DataSheet_3.xlsx]

## Sheet: description
	SARS-CoV-2 neutralizing antibody titer prediction spreadsheet: using a clinical vignette with four important variables
	This first sheet provides the aim, description, formulas and references for the Excel spreadsheet. The spreadsheet is intended to help selecting donors of COVID-19 convalescent plasma with high neutralizing antibody response.
Aim:	To estimate the probability of higher (at least ≥1:80, preferably ≥1:320 ) SARS-CoV-2 neutralizing antibody titers.
Description:	Patient characteristics (sex, age, fever, anosmia/dysgeusia, and requirement for hospitalization) are filled in columns C to G of a sheet for the required neutralizing antibody titer as determined in a plaque reduction neutralization test (e.g. PRNT50>=320). The probability of higher PRNT50 titer is automatically calculated in column L, along with the 95% prediction interval. Cells shaded gray ca…
Uncertainty:	The estimates of the probability are uncertain for two reasons. 1. The limited number of samples (n=203) causes statistical uncertainty. This uncertainty is reflected in the 95% prediction interval. 2. The predictions do not have to be valid for other populations than that used for the development of the predictive model.
Formulas:	A proportional odds logistic regression model was used to calculate multivariable regression coefficients of clinical factors for higher SARS-CoV-2 neutralizing antibody titers. The full model was prespecified to include variables sex, age in years, days after positive SARS-CoV-2 PCR testing, fever, dyspnea, cough, anosmia/dysgeusia, and requirement for hospitalization. For developing a predictiv…
References:	1. Frank E. Harrell Jr. "Regression Modeling Strategies: With Applications to Linear Models, Logistic Regression, and Survival Analysis" DOI: https://doi.org/10.1007/978-1-4757-3462-1 2. Ewout W Steyerberg "Clinical Prediction Models: A Practical Approach to Development, Validation, and Updating" DOI: https://doi.org/10.1007/978-0-387-77244-8 3. http://www.clinicalpredictionmodels.org/lib/exe/fet…
Authors:	Stephan Schlickeiser and Leif Hanitsch, Institute of Medical Immunology, Charité - Universitätsmedizin Berlin, Berlin, Germany
Version:	October 19, 2020
Disclaimer:	No responsibility for any errors can be taken, nor for any consequences from using this spreadsheet.

## Sheet: PRNT50>=320
ID	Intercept	sex (0=female, 1=male)	age (in years)	fever (0=no, 1=yes)	anosmia.or.dysgeusia (0=no, 1=yes)	hospitalized (0=no, 1=yes)		lp	SE		Pr(PRNT50>=1:320)	95% Confidence Interval		-	+		lp	Probability							covariance matrix
7772	1	1	24.0794	0	0	0		-3.70285	0.395431		0.0240599	0.0112297	0.0507958	0.0128302	0.0267359		-4	0.0179862			Coef	SE	Intercept	sex	age	fever	anosmia.or.dysgeusia	hospitalized
7663	1	1	28.5886	0	0	0		-3.59288	0.377691		0.0267819	0.012956	0.0545467	0.0138259	0.0277648		-3.9	0.0198403		Intercept	-3.68921	0.524823	0.275439	-0.0134153	-0.00431043	-0.0317789	-0.0366537	-0.00245422
7727	1	1	28.9637	0	0	0		-3.58373	0.376446		0.0270214	0.013105	0.0548937	0.0139164	0.0278723		-3.8	0.0218813		sex	-0.600896	0.238581	-0.0134153	0.0569207	-0.000114827	-0.0101813	0.00393439	-0.00838024
7718	1	1	30.0096	0	0	0		-3.55823	0.373173		0.0277001	0.0135244	0.0558926	0.0141758	0.0281925		-3.7	0.024127		age	0.0243882	0.0105021	-0.00431043	-0.000114827	0.000110295	-0.00010493	-4.51725e-05	-0.000528456
7899	1	1	30.9131	0	0	0		-3.53619	0.370584		0.0282998	0.0138908	0.0567944	0.014409	0.0284946		-3.6	0.026597		fever	0.909001	0.246205	-0.0317789	-0.0101813	-0.00010493	0.0606171	0.00510379	-0.017423
7734	1	1	31.3895	0	0	0		-3.52457	0.36931		0.028621	0.0140855	0.0572849	0.0145355	0.0286639		-3.5	0.0293122		anosmia.or.dysgeusia	0.412921	0.234924	-0.0366537	0.00393439	-4.51725e-05	0.00510379	0.0551894	0.00596933
7805	1	1	35.0335	0	0	0		-3.4357	0.361711		0.0311981	0.0156016	0.0614133	0.0155965	0.0302152		-3.4	0.0322955		hospitalized	1.53278	0.445056	-0.00245422	-0.00838024	-0.000528456	-0.017423	0.00596933	0.198075
7834	1	1	37.0815	0	0	0		-3.38576	0.359164		0.0327436	0.0164682	0.0640561	0.0162754	0.0313126		-3.3	0.0355712
7722	1	1	38.3409	0	0	0		-3.35504	0.35823		0.0337304	0.0170037	0.0658098	0.0167267	0.0320794		-3.2	0.0391657
7679	1	1	22.5982	0	1	0		-3.32606	0.386728		0.0346881	0.0165604	0.0712219	0.0181277	0.0365338		-3.1	0.0431073
7704	1	1	23.2526	0	1	0		-3.3101	0.383428		0.0352264	0.0169296	0.0718523	0.0182968	0.0366259		-3	0.0474259
7703	1	1	23.6715	0	1	0		-3.29988	0.381365		0.0355753	0.0171686	0.0722651	0.0184067	0.0366898		-2.9	0.0521536
7776	1	1	40.627	0	0	0		-3.29929	0.357781		0.0355956	0.0179767	0.0692648	0.0176189	0.0336692		-2.8	0.0573242
7721	1	1	41.2786	0	0	0		-3.2834	0.357948		0.0361452	0.0182535	0.0703177	0.0178917	0.0341725		-2.7	0.0629734
7720	1	1	26.4832	0	1	0		-3.23131	0.368584		0.0380044	0.0188219	0.0752378	0.0191825	0.0372334		-2.6	0.0691384
7788	1	1	43.54	0	0	0		-3.22824	0.359538		0.0381166	0.0192098	0.0742237	0.0189068	0.0361071		-2.5	0.0758582
7755	1	0	19.436	0	0	0		-3.2152	0.386716		0.0385977	0.0184664	0.0789108	0.0201313	0.0403132		-2.4	0.0831727
7695	1	1	27.5318	0	1	0		-3.20573	0.364316		0.0389505	0.019459	0.0764438	0.0194915	0.0374933		-2.3	0.091123
7897	1	0	19.9179	0	0	0		-3.20345	0.38404		0.0390361	0.018777	0.0793851	0.0202591	0.040349		-2.2	0.0997505
7699	1	1	28.5695	0	1	0		-3.18043	0.360373		0.039909	0.0200994	0.0776943	0.0198095	0.0377853		-2.1	0.109097
7757	1	1	29.3005	0	1	0		-3.1626	0.35777		0.0405977	0.0205561	0.078611	0.0200416	0.0380133		-2	0.119203
7668	1	1	29.7741	0	1	0		-3.15105	0.356161		0.04105	0.0208542	0.0792214	0.0201958	0.0381714		-1.9	0.130108
7909	1	0	22.0808	0	0	0		-3.1507	0.372639		0.0410637	0.0202118	0.0816356	0.0208519	0.0405719		-1.8	0.141851
7648	1	0	23.436	0	0	0		-3.11765	0.366033		0.0423851	0.0211431	0.0831556	0.021242	0.0407705		-1.7	0.154465
7790	1	1	48.1177	0	0	0		-3.1166	0.367465		0.0424276	0.0211067	0.0834498	0.0213209	0.0410222		-1.6	0.167982
7662	1	1	48.2902	0	0	0		-3.1124	0.367883		0.0425988	0.0211768	0.083835	0.0214221	0.0412362		-1.5	0.182426
7660	1	1	32.0986	0	1	0		-3.09436	0.349185		0.0433405	0.0223404	0.0824166	0.0210001	0.0390761		-1.4	0.197816
7661	1	0	24.8816	0	0	0		-3.08239	0.359474		0.0438394	0.0221621	0.0848794	0.0216773	0.04104		-1.3	0.214165
7640	1	0	25.3854	0	0	0		-3.07011	0.357312		0.0443573	0.022523	0.0855066	0.0218343	0.0411493		-1.2	0.231475
7649	1	1	33.1472	0	1	0		-3.06879	0.346556		0.0444133	0.0230215	0.0839741	0.0213918	0.0395608		-1.1	0.24974
7824	1	0	25.5086	0	0	0		-3.0671	0.356793		0.0444848	0.0226117	0.0856622	0.0218731	0.0411773		-1	0.268941
7739	1	0	27.5264	0	0	0		-3.01789	0.348868		0.0466241	0.0240876	0.088337	0.0225364	0.041713		-0.9	0.28905
7652	1	0	28.3915	0	0	0		-2.99679	0.345813		0.047571	0.0247327	0.0895616	0.0228383	0.0419906		-0.8	0.310026
7694	1	1	37.2813	0	1	0		-2.96796	0.339488		0.0488944	0.0257469	0.0909107	0.0231475	0.0420163		-0.7	0.331812
7802	1	0	29.8371	0	0	0		-2.96154	0.341187		0.049194	0.0258246	0.09172	0.0233694	0.042526		-0.6	0.354344
7670	1	0	30.6229	0	0	0		-2.94237	0.338931		0.0500982	0.0264246	0.0929556	0.0236735	0.0428574		-0.5	0.377541
7717	1	0	31.0801	0	0	0		-2.93122	0.337704		0.0506315	0.0267756	0.0936957	0.0238559	0.0430642		-0.4	0.401312
7702	1	0	31.2389	0	0	0		-2.92735	0.337293		0.050818	0.0268978	0.0939564	0.0239202	0.0431385		-0.3	0.425557
7908	1	0	31.5127	0	0	0		-2.92067	0.336603		0.051141	0.0271088	0.0944106	0.0240322	0.0432696		-0.2	0.450166
7756	1	0	31.8138	0	0	0		-2.91333	0.33587		0.0514986	0.0273413	0.094917	0.0241573	0.0434184		-0.1	0.475021
7690	1	0	32.5065	0	0	0		-2.89644	0.334292		0.05233	0.0278779	0.0961092	0.0244522	0.0437791		0	0.5
7706	1	1	40.293	0	1	0		-2.89451	0.337776		0.0524255	0.0277452	0.0968722	0.0246803	0.0444467		0.1	0.524979
7732	1	1	42.7159	0	1	0		-2.83542	0.338545		0.0554398	0.0293416	0.102305	0.0260983	0.0468651		0.2	0.549834
7741	1	1	43.0856	0	1	0		-2.82641	0.33883		0.0559138	0.0295833	0.103188	0.0263304	0.0472737		0.3	0.574443
7865	1	0	35.9918	0	0	0		-2.81144	0.328689		0.0567093	0.0306003	0.102734	0.026109	0.046025		0.4	0.598688
7744	1	0	36.2245	0	0	0		-2.80576	0.328456		0.0570137	0.0307827	0.103216	0.026231	0.0462028		0.5	0.622459
7673	1	1	43.9535	0	1	0		-2.80524	0.339674		0.0570417	0.0301487	0.105318	0.0268929	0.0482767		0.6	0.645656
7763	1	0	36.5914	0	0	0		-2.79681	0.328127		0.0574966	0.0310702	0.103987	0.0264264	0.0464908		0.7	0.668188
7658	1	1	44.3231	0	1	0		-2.79623	0.340106		0.0575284	0.0303884	0.106251	0.02714	0.0487228		0.8	0.689974
7643	1	1	24.7118	1	0	0		-2.77843	0.354517		0.058501	0.0300821	0.110703	0.0284189	0.0522024		0.9	0.71095
7926	1	1	25.347	1	0	0		-2.76294	0.351332		0.0593601	0.0307227	0.111617	0.0286374	0.0522571		1	0.731059
7779	1	1	45.8316	0	1	0		-2.75944	0.342323		0.059556	0.0313591	0.110221	0.0281968	0.0506653		1.1	0.75026
7698	1	0	39.3539	0	0	0		-2.72944	0.327096		0.0612583	0.0332287	0.110236	0.0280296	0.0489777		1.2	0.768525
7803	1	0	39.4524	0	0	0		-2.72704	0.327107		0.0613967	0.0333053	0.110474	0.0280914	0.0490774		1.3	0.785835
7733	1	0	39.6879	0	0	0		-2.72129	0.327146		0.0617284	0.0334882	0.111047	0.0282402	0.0493187		1.4	0.802184
7880	1	0	23.9945	0	1	0		-2.69111	0.334367		0.0635002	0.0340111	0.1155	0.0294891	0.0520003		1.5	0.817574
7665	1	1	28.3066	1	0	0		-2.69076	0.337836		0.0635209	0.0337998	0.116233	0.0297211	0.0527118		1.6	0.832018
7881	1	0	41.2457	0	0	0		-2.6833	0.327873		0.0639659	0.0346922	0.114998	0.0292737	0.0510325		1.7	0.845535
7809	1	1	28.7009	1	0	0		-2.68114	0.336214		0.0640953	0.0342201	0.116895	0.0298752	0.0528002		1.8	0.858149
7738	1	1	49.0897	0	1	0		-2.67998	0.349521		0.0641652	0.0334062	0.119738	0.0307591	0.0555724		1.9	0.869892
7664	1	1	29.7413	1	0	0		-2.65577	0.332144		0.0656343	0.0353396	0.118703	0.0302947	0.053069		2	0.880797
7644	1	0	26.7871	0	1	0		-2.623	0.321116		0.0676728	0.0372412	0.119875	0.0304316	0.0522024		2.1	0.890903
7775	1	1	31.2772	1	0	0		-2.61831	0.326712		0.0679692	0.0370167	0.121537	0.0309525	0.0535677		2.2	0.90025
7672	1	0	27.0335	0	1	0		-2.61699	0.320049		0.068053	0.0375327	0.120289	0.0305202	0.0522364		2.3	0.908877
7678	1	0	27.1567	0	1	0		-2.61399	0.319523		0.0682438	0.0376788	0.120498	0.0305649	0.0522544		2.4	0.916827
7796	1	1	32.4928	1	0	0		-2.58866	0.322919		0.0698715	0.0383614	0.123928	0.0315101	0.0540569		2.5	0.924142
7773	1	0	29.7604	0	1	0		-2.55049	0.309449		0.0723939	0.0408161	0.125213	0.0315777	0.0528189		2.6	0.930862
7650	1	0	29.9877	0	1	0		-2.54494	0.308669		0.0727669	0.0410938	0.125653	0.0316731	0.0528862		2.7	0.937027
7683	1	1	34.4394	1	0	0		-2.54119	0.317821		0.0730205	0.0405385	0.128056	0.032482	0.055035		2.8	0.942676
7770	1	1	34.4476	1	0	0		-2.54099	0.317802		0.0730341	0.0405478	0.128074	0.0324863	0.0550396		2.9	0.947846
7781	1	1	34.4778	1	0	0		-2.54026	0.317733		0.0730838	0.0405816	0.128141	0.0325022	0.0550568		3	0.952574
7723	1	0	30.7324	0	1	0		-2.52678	0.30623		0.0740019	0.0420075	0.127131	0.0319944	0.0531287		3.1	0.956893
7669	1	0	31.3018	0	1	0		-2.51289	0.304487		0.0749592	0.0427094	0.128297	0.0322498	0.0533379		3.2	0.960834
7850	1	1	35.9863	1	0	0		-2.50346	0.314659		0.0756156	0.0422818	0.131617	0.0333338	0.0560018		3.3	0.964429
7749	1	1	56.9747	0	1	0		-2.48768	0.379352		0.0767266	0.0380081	0.148787	0.0387185	0.0720603		3.4	0.967705
7817	1	0	32.4983	0	1	0		-2.48371	0.301179		0.0770078	0.0441915	0.130857	0.0328163	0.0538491		3.5	0.970688
7793	1	1	57.8782	0	1	0		-2.46564	0.383764		0.0783022	0.0385006	0.152715	0.0398015	0.0744127		3.6	0.973403
7887	1	0	50.6366	0	0	0		-2.45428	0.348872		0.0791263	0.0415641	0.145482	0.0375622	0.0663553		3.7	0.975873
7659	1	0	33.8973	0	1	0		-2.44959	0.297938		0.0794682	0.0459329	0.134047	0.0335353	0.0545792		3.8	0.978119
7762	1	1	38.8693	1	0	0		-2.43315	0.310953		0.0806792	0.045537	0.138992	0.0351421	0.0583129		3.9	0.98016
7750	1	0	34.5763	0	1	0		-2.43304	0.296614		0.080688	0.0467796	0.135677	0.0339084	0.0549887		4	0.982014
7798	1	0	34.7105	0	1	0		-2.42976	0.296372		0.0809311	0.0469469	0.136005	0.0339841	0.0550741
7847	1	0	51.9945	0	0	0		-2.42116	0.354086		0.0815734	0.042486	0.150952	0.0390874	0.069379
7747	1	1	39.6934	1	0	0		-2.41306	0.310429		0.0821825	0.0464641	0.14129	0.0357184	0.0591076
7867	1	1	40.052	1	0	0		-2.40431	0.310276		0.0828446	0.0468666	0.142318	0.0359781	0.0594734
7836	1	1	23.6112	1	1	0		-2.39235	0.35723		0.083758	0.0434169	0.15549	0.0403411	0.0717316
7771	1	1	40.7529	1	0	0		-2.38722	0.310109		0.0841527	0.0476509	0.144377	0.0365018	0.0602241
7736	1	0	37.2567	0	1	0		-2.36767	0.29303		0.0856718	0.0501157	0.142665	0.0355561	0.0569936
7713	1	0	37.7714	0	1	0		-2.35511	0.292647		0.0866602	0.0507528	0.144115	0.0359074	0.0574548
7768	1	1	25.4401	1	1	0		-2.34775	0.347523		0.0872451	0.0461376	0.158878	0.0411075	0.0716327
7782	1	1	25.922	1	1	0		-2.33599	0.345098		0.0881855	0.0468694	0.159815	0.041316	0.0716298
7677	1	1	26.1985	1	1	0		-2.32925	0.343732		0.0887293	0.0472921	0.160362	0.0414372	0.0716329
7701	1	0	38.8474	0	1	0		-2.32887	0.292168		0.0887598	0.0520784	0.147264	0.0366814	0.0585042
7647	1	1	43.384	1	0	0		-2.32305	0.311038		0.0892319	0.0505613	0.152721	0.0386706	0.0634895
7789	1	1	26.4723	1	1	0		-2.32257	0.342399		0.0892706	0.0477124	0.16091	0.0415582	0.0716395
7863	1	0	39.6851	0	1	0		-2.30844	0.292097		0.0904263	0.0531033	0.149831	0.037323	0.0594043
7832	1	1	29.6454	1	1	0		-2.24519	0.328391		0.0957656	0.0527084	0.167767	0.0430571	0.0720009
7740	1	0	42.5927	0	1	0		-2.23753	0.293901		0.0964306	0.056595	0.159563	0.0398356	0.0631324
7826	1	1	30.1328	1	1	0		-2.2333	0.326487		0.0967997	0.0534936	0.168908	0.0433061	0.0721085
7752	1	0	42.7789	0	1	0		-2.23299	0.294124		0.0968269	0.0568144	0.160232	0.0400125	0.0634048
7651	1	1	48.1807	1	0	0		-2.20607	0.318947		0.0992071	0.0556611	0.170664	0.0435459	0.0714569
7764	1	1	48.2519	1	0	0		-2.20433	0.319123		0.0993623	0.0557343	0.170959	0.043628	0.0715963
7666	1	1	48.282	1	0	0		-2.2036	0.319198		0.0994281	0.0557653	0.171084	0.0436628	0.0716555
7769	1	0	44.2875	0	1	0		-2.1962	0.296403		0.100092	0.0585717	0.165861	0.0415208	0.0657687
7864	1	1	48.731	1	0	0		-2.19265	0.320349		0.100413	0.0562248	0.172965	0.0441881	0.0725517
7778	1	0	44.6543	0	1	0		-2.18725	0.297082		0.100901	0.0589931	0.167288	0.0419082	0.0663868
7754	1	0	44.6626	0	1	0		-2.18705	0.297097		0.100919	0.0590025	0.16732	0.0419169	0.0664008
7638	1	1	32.5859	1	1	0		-2.17347	0.317987		0.102158	0.0575012	0.175055	0.0446568	0.0728967
7656	1	1	49.8453	1	0	0		-2.16547	0.323485		0.102894	0.0573512	0.177783	0.0455433	0.0748889
7693	1	0	25.347	1	0	0		-2.16204	0.345728		0.103211	0.0552179	0.184761	0.0479935	0.0815501
7807	1	0	45.9521	0	1	0		-2.1556	0.299869		0.103809	0.0604636	0.172522	0.0433454	0.068713
7758	1	1	33.6591	1	1	0		-2.1473	0.31486		0.104584	0.0592772	0.177968	0.0453067	0.0733843
7686	1	0	26.1164	1	0	0		-2.14328	0.3422		0.104961	0.0565728	0.186553	0.0483881	0.0815918
7852	1	0	46.4942	0	1	0		-2.14238	0.301209		0.105045	0.0610683	0.174796	0.0439771	0.0697505
7916	1	1	33.9959	1	1	0		-2.13909	0.313955		0.105355	0.0598365	0.178912	0.045519	0.0735568
7681	1	1	34.0205	1	1	0		-2.13849	0.31389		0.105412	0.0598774	0.178982	0.0455347	0.0735698
7838	1	0	26.9103	1	0	0		-2.12392	0.338722		0.106794	0.0579864	0.188464	0.0488076	0.0816704
7711	1	1	52.0465	1	0	0		-2.11179	0.330812		0.107957	0.0595145	0.187949	0.0484422	0.0799922
7642	1	1	35.6304	1	1	0		-2.09922	0.310102		0.109172	0.0625602	0.183708	0.0466121	0.0745357
7653	1	0	28.4901	1	0	0		-2.08539	0.332318		0.110525	0.0608404	0.192469	0.0496848	0.0819442
7671	1	0	28.7529	1	0	0		-2.07898	0.331321		0.111157	0.06132	0.193163	0.0498369	0.082006
7748	1	0	49.2813	0	1	0		-2.07441	0.30966		0.111609	0.0640834	0.187327	0.0475259	0.0757176
7873	1	1	37.3908	1	1	0		-2.05629	0.306972		0.113418	0.0655003	0.189291	0.047918	0.0758726
7822	1	0	50.0452	0	1	0		-2.05578	0.312416		0.11347	0.0648814	0.191013	0.0485884	0.0775428
7708	1	1	37.4237	1	1	0		-2.05549	0.306924		0.113499	0.0655552	0.189399	0.0479438	0.0759005
7691	1	1	54.9979	1	0	0		-2.03981	0.342843		0.115086	0.0622819	0.20297	0.0528046	0.0878837
7714	1	1	38.935	1	1	0		-2.01863	0.305125		0.117261	0.0680729	0.19457	0.0491878	0.0773091
7746	1	1	39.5592	1	1	0		-2.00341	0.30462		0.118846	0.0691087	0.19681	0.049737	0.0779644
7868	1	0	52.5175	0	1	0		-1.99548	0.322543		0.119678	0.0673789	0.203704	0.052299	0.0840265
7684	1	1	40.011	1	1	0		-1.99239	0.304342		0.120004	0.0698562	0.198471	0.0501481	0.0784666
7875	1	1	57.1828	1	0	0		-1.98652	0.35324		0.120625	0.0642315	0.215148	0.0563937	0.0945224
7751	1	0	52.9117	0	1	0		-1.98587	0.32432		0.120695	0.0677651	0.205838	0.0529295	0.0851429
7866	1	0	35.0198	1	0	0		-1.92614	0.313868		0.127179	0.0730118	0.212326	0.0541667	0.0851479
7676	1	0	18.1081	1	1	0		-1.92566	0.373109		0.127231	0.0655615	0.232479	0.0616699	0.105247
7851	1	0	35.1431	1	0	0		-1.92313	0.313653		0.127512	0.073244	0.212759	0.0542685	0.0852466
7848	1	0	55.5264	0	1	0		-1.9221	0.337163		0.127627	0.0702444	0.220756	0.0573829	0.0931291
7716	1	0	55.6057	0	1	0		-1.92017	0.33758		0.127843	0.0703175	0.221231	0.0575256	0.0933875
7892	1	1	60.1342	1	0	0		-1.91454	0.36909		0.128471	0.066735	0.233058	0.0617363	0.104586
7674	1	0	55.8877	0	1	0		-1.91329	0.339074		0.128612	0.070576	0.222925	0.0580358	0.0943129
7761	1	1	43.4387	1	1	0		-1.90879	0.304643		0.129117	0.0754462	0.212204	0.0536704	0.0830871
7687	1	0	56.3888	0	1	0		-1.90107	0.341777		0.129987	0.0710315	0.225974	0.058956	0.0959863
7839	1	0	36.0849	1	0	0		-1.90016	0.312186		0.13009	0.0750177	0.216144	0.0550721	0.0860543
7797	1	0	56.7201	0	1	0		-1.89299	0.343596		0.130904	0.0713299	0.228017	0.0595741	0.0971132
7654	1	1	44.1314	1	1	0		-1.8919	0.305219		0.131028	0.0765531	0.215232	0.054475	0.0842043
7689	1	0	57.2074	0	1	0		-1.8811	0.346319		0.132262	0.0717649	0.231063	0.0604971	0.0988008
7742	1	0	20.0493	1	1	0		-1.87832	0.360643		0.132582	0.0700982	0.236591	0.0624835	0.104009
7712	1	1	63.0363	1	0	0		-1.84377	0.38647		0.136607	0.0690582	0.252318	0.0675483	0.115712
7786	1	0	59.1211	0	1	0		-1.83443	0.357519		0.137711	0.0734292	0.24348	0.064282	0.105769
7879	1	0	39.3648	1	0	0		-1.82017	0.309501		0.139413	0.0811521	0.229073	0.058261	0.0896602
7657	1	0	23.2252	1	1	0		-1.80087	0.34189		0.141745	0.0779183	0.24402	0.0638272	0.102275
7869	1	1	49.0376	1	1	0		-1.77225	0.314134		0.145263	0.0840964	0.239296	0.0611669	0.0940327
7774	1	0	41.8782	1	0	0		-1.75888	0.310028		0.146931	0.0857606	0.240266	0.0611704	0.093335
7855	1	1	50.4394	1	1	0		-1.73806	0.318171		0.14956	0.0861423	0.247043	0.0634174	0.0974838
7825	1	0	25.8754	1	1	0		-1.73623	0.328022		0.149792	0.084776	0.250996	0.0650161	0.101204
7818	1	1	69.7604	1	0	0		-1.67978	0.432346		0.157125	0.073975	0.303142	0.0831501	0.146017
7780	1	0	28.6379	1	1	0		-1.66886	0.315537		0.158576	0.092179	0.259147	0.066397	0.100571
7655	1	0	28.9336	1	1	0		-1.66165	0.31433		0.159541	0.0929836	0.260078	0.066557	0.100537
7705	1	0	29.6756	1	1	0		-1.64355	0.311417		0.161982	0.0950108	0.262469	0.0669712	0.100487
7924	1	0	46.6393	1	0	0		-1.64276	0.317106		0.16209	0.0941239	0.264787	0.0679656	0.102698
7682	1	0	47.9781	1	0	0		-1.61011	0.320477		0.166573	0.0963682	0.2725	0.070205	0.105926
7728	1	0	31.9179	1	1	0		-1.58887	0.303661		0.169543	0.101192	0.270183	0.0683506	0.10064
7816	1	0	31.9288	1	1	0		-1.5886	0.303627		0.169581	0.101223	0.270223	0.0683579	0.100642
7641	1	0	31.9452	1	1	0		-1.5882	0.303576		0.169637	0.101268	0.270282	0.0683688	0.100645
7646	1	0	49.0349	1	0	0		-1.58434	0.323544		0.170182	0.0981029	0.278846	0.0720792	0.108664
7645	1	1	74.1875	1	0	0		-1.57181	0.46594		0.171959	0.076913	0.341062	0.0950459	0.169103
7854	1	0	32.8296	1	1	0		-1.56663	0.300977		0.172697	0.103721	0.273543	0.068976	0.100847
7688	1	0	34.527	1	1	0		-1.52524	0.29674		0.178692	0.108433	0.280169	0.0702587	0.101477
7700	1	0	34.9295	1	1	0		-1.51542	0.295884		0.180137	0.109549	0.281813	0.0705876	0.101676
7745	1	0	52.5065	1	0	0		-1.49967	0.336012		0.182475	0.103562	0.301306	0.0789122	0.118831
7791	1	0	36.8186	1	1	0		-1.46935	0.29265		0.187042	0.114767	0.289924	0.0722742	0.102882
7905	1	0	54.3381	1	0	0		-1.455	0.343968		0.189233	0.106293	0.314142	0.0829401	0.124909
7925	1	0	37.9658	1	1	0		-1.44137	0.291329		0.191333	0.11791	0.295178	0.0734233	0.103845
7823	1	0	40.5613	1	1	0		-1.37807	0.290168		0.201319	0.124902	0.308031	0.0764163	0.106712
7637	1	0	42.0999	1	1	0		-1.34055	0.290688		0.20742	0.128948	0.316306	0.0784724	0.108886
7675	1	0	44.2683	1	1	0		-1.28766	0.292935		0.216248	0.134491	0.328823	0.081757	0.112575
7715	1	0	49.963	1	1	0		-1.14878	0.306911		0.240712	0.148006	0.366506	0.0927059	0.125794
7808	1	0	50.2615	1	1	0		-1.1415	0.307947		0.242045	0.148669	0.36867	0.0933756	0.126625
7859	1	0	50.6393	1	1	0		-1.13229	0.309298		0.243739	0.149502	0.371435	0.0942371	0.127696
7840	1	0	52.679	1	1	0		-1.08254	0.317352		0.253025	0.153871	0.386859	0.0991536	0.133834
7685	1	0	54.1684	1	1	0		-1.04622	0.324002		0.259952	0.156928	0.39863	0.103024	0.138679
7709	1	0	54.7461	1	1	0		-1.03213	0.326747		0.262671	0.158084	0.403306	0.104587	0.140635
7707	1	0	57.7604	1	1	0		-0.958616	0.342458		0.277155	0.163853	0.428641	0.113302	0.151485
7870	1	0	58.8145	1	1	0		-0.932909	0.348463		0.282335	0.165771	0.437843	0.116563	0.155508
7753	1	0	60.3833	1	1	0		-0.89465	0.357849		0.290151	0.168537	0.451834	0.121615	0.161682
7871	1	0	35.3155	0	1	1		-0.882224	0.504994		0.292717	0.133309	0.526865	0.159408	0.234148
7885	1	1	40.6735	1	0	1		-0.85637	0.4413		0.298098	0.151701	0.502144	0.146397	0.204046
7804	1	1	43.8193	1	0	1		-0.77965	0.438446		0.314395	0.162601	0.519916	0.151795	0.20552
7667	1	1	30.5955	1	1	1		-0.689233	0.476048		0.334204	0.16489	0.560655	0.169314	0.226451
7719	1	0	23.6632	1	0	1		-0.670323	0.508533		0.338425	0.158818	0.580884	0.179606	0.242459
7886	1	1	48.512	1	0	1		-0.665204	0.438801		0.339572	0.178689	0.548558	0.160882	0.208986
7907	1	0	26.1081	1	0	1		-0.610696	0.497848		0.3519	0.16988	0.590271	0.18202	0.238371
7784	1	1	51.1184	1	0	1		-0.601638	0.441382		0.353969	0.187438	0.565489	0.166531	0.21152
7898	1	1	40.4791	1	1	1		-0.448189	0.450791		0.389791	0.208872	0.607153	0.18092	0.217362
7906	1	1	40.9665	1	1	1		-0.436304	0.450129		0.392622	0.211059	0.609675	0.181563	0.217053
7680	1	1	47.4223	1	1	1		-0.278858	0.446826		0.430734	0.239643	0.644952	0.191091	0.214218
7884	1	1	64.9336	1	0	1		-0.264711	0.481539		0.434206	0.229962	0.663539	0.204244	0.229333
7787	1	1	58.6229	1	1	1		-0.00569696	0.46511		0.498576	0.285506	0.712164	0.21307	0.213588
7861	1	1	60.7775	1	1	1		0.0468519	0.47192		0.511711	0.293569	0.725481	0.218142	0.21377
7894	1	0	55.3238	1	0	1		0.101819	0.470511		0.525433	0.305682	0.735755	0.21975	0.210322
7891	1	0	56.3066	1	0	1		0.125789	0.473036		0.531406	0.309734	0.741339	0.221672	0.209933
7692	1	0	40.0684	1	1	1		0.142691	0.460567		0.535612	0.318642	0.739891	0.216971	0.204279
7938	1	0	57.3415	1	0	1		0.151029	0.475923		0.537686	0.313936	0.74722	0.223749	0.209534
7639	1	0	55.7372	1	1	1		0.524822	0.470478		0.628275	0.401958	0.80953	0.226317	0.181255

## Sheet: PRNT50>=160
ID	Intercept	sex (0=female, 1=male)	age (in years)	fever (0=no, 1=yes)	anosmia.or.dysgeusia (0=no, 1=yes)	hospitalized (0=no, 1=yes)		lp	SE		Pr(PRNT50>=1:160)	95% Confidence Interval		-	+		lp	Probability							covariance matrix
7772	1	1	24.0794	0	0	0		-2.59092	0.342495		0.0697249	0.0368905	0.127903	0.0328344	0.0581777		-4	0.0179862			Coef	SE	Intercept	sex	age	fever	anosmia.or.dysgeusia	hospitalized
7663	1	1	28.5886	0	0	0		-2.48095	0.323547		0.0772045	0.0424886	0.136249	0.0347159	0.0590448		-3.9	0.0198403		Intercept	-2.57728	0.485263	0.235481	-0.0158896	-0.00418906	-0.027369	-0.0348038	0.0102393
7727	1	1	28.9637	0	0	0		-2.4718	0.322234		0.0778587	0.042968	0.137025	0.0348907	0.0591662		-3.8	0.0218813		sex	-0.600896	0.238581	-0.0158896	0.0569207	-0.000114827	-0.0101813	0.00393439	-0.00838024
7718	1	1	30.0096	0	0	0		-2.4463	0.318803		0.0797098	0.0443131	0.139261	0.0353967	0.059551		-3.7	0.024127		age	0.0243882	0.0105021	-0.00418906	-0.000114827	0.000110295	-0.00010493	-4.51725e-05	-0.000528456
7899	1	1	30.9131	0	0	0		-2.42426	0.316116		0.0813412	0.0454838	0.141283	0.0358574	0.0599417		-3.6	0.026597		fever	0.909001	0.246205	-0.027369	-0.0101813	-0.00010493	0.0606171	0.00510379	-0.017423
7734	1	1	31.3895	0	0	0		-2.41264	0.314805		0.0822136	0.0461037	0.142384	0.0361099	0.0601707		-3.5	0.0293122		anosmia.or.dysgeusia	0.412921	0.234924	-0.0348038	0.00393439	-4.51725e-05	0.00510379	0.0551894	0.00596933
7805	1	1	35.0335	0	0	0		-2.32377	0.307297		0.0891733	0.0508796	0.151682	0.0382937	0.0625088		-3.4	0.0322955		hospitalized	1.53278	0.445056	0.0102393	-0.00838024	-0.000528456	-0.017423	0.00596933	0.198075
7834	1	1	37.0815	0	0	0		-2.27383	0.305111		0.093314	0.0535631	0.157651	0.0397509	0.0643372		-3.3	0.0355712
7722	1	1	38.3409	0	0	0		-2.24311	0.304514		0.0959453	0.0552027	0.161614	0.0407426	0.0656691		-3.2	0.0391657
7679	1	1	22.5982	0	1	0		-2.21412	0.337396		0.0984893	0.0533821	0.174678	0.0451072	0.0761888		-3.1	0.0431073
7704	1	1	23.2526	0	1	0		-2.19817	0.333846		0.0999153	0.054552	0.17598	0.0453633	0.0760643		-3	0.0474259
7703	1	1	23.6715	0	1	0		-2.18795	0.331629		0.100838	0.0553079	0.176832	0.0455299	0.0759947		-2.9	0.0521536
7776	1	1	40.627	0	0	0		-2.18736	0.304896		0.100892	0.0581427	0.169417	0.0427489	0.068526		-2.8	0.0573242
7721	1	1	41.2786	0	0	0		-2.17147	0.305351		0.102342	0.0589696	0.171792	0.0433727	0.06945		-2.7	0.0629734
7720	1	1	26.4832	0	1	0		-2.11938	0.317923		0.107228	0.0605114	0.182986	0.0467164	0.0757581		-2.6	0.0691384
7788	1	1	43.54	0	0	0		-2.11631	0.308106		0.107521	0.0617918	0.18058	0.0457295	0.0730582		-2.5	0.0758582
7755	1	0	19.436	0	0	0		-2.10327	0.338095		0.108779	0.0591929	0.191452	0.0495865	0.0826725		-2.4	0.0831727
7695	1	1	27.5318	0	1	0		-2.0938	0.313371		0.109701	0.0625024	0.185488	0.0471982	0.0757878		-2.3	0.091123
7897	1	0	19.9179	0	0	0		-2.09152	0.335205		0.109924	0.0601702	0.192396	0.0497537	0.0824721		-2.2	0.0997505
7699	1	1	28.5695	0	1	0		-2.0685	0.309186		0.112197	0.0644948	0.188087	0.0477019	0.0758899		-2.1	0.109097
7757	1	1	29.3005	0	1	0		-2.05067	0.306437		0.113985	0.0659098	0.189994	0.048075	0.0760088		-2	0.119203
7668	1	1	29.7741	0	1	0		-2.03912	0.304746		0.115157	0.066831	0.191264	0.0483256	0.0761077		-1.9	0.130108
7909	1	0	22.0808	0	0	0		-2.03877	0.322894		0.115192	0.0646676	0.196882	0.0505245	0.08169		-1.8	0.141851
7648	1	0	23.436	0	0	0		-2.00572	0.315769		0.118604	0.0675703	0.199917	0.0510336	0.0813135		-1.7	0.154465
7790	1	1	48.1177	0	0	0		-2.00467	0.319066		0.118713	0.0672299	0.201121	0.0514834	0.0824078		-1.6	0.167982
7662	1	1	48.2902	0	0	0		-2.00047	0.319613		0.119154	0.0674267	0.201971	0.0517274	0.0828164		-1.5	0.182426
7660	1	1	32.0986	0	1	0		-1.98243	0.297513		0.12106	0.0713884	0.197927	0.0496718	0.0768667		-1.4	0.197816
7661	1	0	24.8816	0	0	0		-1.97046	0.308711		0.122339	0.0707296	0.203366	0.0516097	0.0810267		-1.3	0.214165
7640	1	0	25.3854	0	0	0		-1.95818	0.30639		0.123665	0.0718441	0.204622	0.0518204	0.0809577		-1.2	0.231475
7649	1	1	33.1472	0	1	0		-1.95686	0.294855		0.123808	0.0734563	0.201179	0.0503515	0.0773716		-1.1	0.24974
7824	1	0	25.5086	0	0	0		-1.95517	0.305834		0.123991	0.0721177	0.204934	0.0518729	0.0809434		-1	0.268941
7739	1	0	27.5264	0	0	0		-1.90596	0.297375		0.129435	0.0766459	0.210302	0.0527894	0.0808667		-0.9	0.28905
7652	1	0	28.3915	0	0	0		-1.88486	0.294142		0.131831	0.0786104	0.212764	0.0532211	0.0809327		-0.8	0.310026
7694	1	1	37.2813	0	1	0		-1.85603	0.28826		0.135166	0.0815838	0.215677	0.0535826	0.0805103		-0.7	0.331812
7802	1	0	29.8371	0	0	0		-1.84961	0.289296		0.135919	0.0819136	0.21711	0.0540055	0.0811912		-0.6	0.354344
7670	1	0	30.6229	0	0	0		-1.83044	0.286965		0.138185	0.0837162	0.219601	0.0544693	0.0814156		-0.5	0.377541
7717	1	0	31.0801	0	0	0		-1.81929	0.285709		0.139519	0.0847662	0.221094	0.0547526	0.0815752		-0.4	0.401312
7702	1	0	31.2389	0	0	0		-1.81542	0.285291		0.139984	0.085131	0.22162	0.0548534	0.0816357		-0.3	0.425557
7908	1	0	31.5127	0	0	0		-1.80874	0.284591		0.14079	0.08576	0.222537	0.0550302	0.0817465		-0.2	0.450166
7756	1	0	31.8138	0	0	0		-1.8014	0.283852		0.141681	0.0864519	0.223559	0.0552292	0.0818777		-0.1	0.475021
7690	1	0	32.5065	0	0	0		-1.7845	0.282282		0.143748	0.0880423	0.225966	0.0557055	0.0822179		0	0.5
7706	1	1	40.293	0	1	0		-1.78258	0.287517		0.143985	0.0873751	0.228104	0.0566095	0.0841192		0.1	0.524979
7732	1	1	42.7159	0	1	0		-1.72349	0.289437		0.151422	0.0918888	0.23936	0.0595334	0.0879376		0.2	0.549834
7741	1	1	43.0856	0	1	0		-1.71448	0.289926		0.152584	0.0925634	0.24118	0.0600207	0.0885959		0.3	0.574443
7865	1	0	35.9918	0	0	0		-1.6995	0.277154		0.15453	0.0959788	0.239343	0.0585512	0.0848132		0.4	0.598688
7744	1	0	36.2245	0	0	0		-1.69383	0.27698		0.155273	0.096502	0.240316	0.0587709	0.085043		0.5	0.622459
7673	1	1	43.9535	0	1	0		-1.69331	0.291272		0.155341	0.0941313	0.245564	0.0612098	0.0902224		0.6	0.645656
7763	1	0	36.5914	0	0	0		-1.68488	0.27675		0.15645	0.0973245	0.241871	0.0591256	0.0854205		0.7	0.668188
7658	1	1	44.3231	0	1	0		-1.6843	0.291931		0.156528	0.0947921	0.247477	0.0617355	0.0909499		0.8	0.689974
7643	1	1	24.7118	1	0	0		-1.6665	0.309181		0.158892	0.0934269	0.257213	0.0654648	0.0983217		0.9	0.71095
7926	1	1	25.347	1	0	0		-1.65101	0.305776		0.160973	0.0953212	0.258902	0.0656518	0.0979287		1	0.731059
7779	1	1	45.8316	0	1	0		-1.6475	0.295131		0.161447	0.0974433	0.255584	0.0640033	0.0941377		1.1	0.75026
7698	1	0	39.3539	0	0	0		-1.61751	0.276742		0.165549	0.103408	0.254435	0.062141	0.0888865		1.2	0.768525
7803	1	0	39.4524	0	0	0		-1.61511	0.276797		0.165881	0.10362	0.254912	0.0622604	0.0890312		1.3	0.785835
7733	1	0	39.6879	0	0	0		-1.60936	0.276947		0.166677	0.104128	0.25606	0.0625492	0.089383		1.4	0.802184
7880	1	0	23.9945	0	1	0		-1.57917	0.285248		0.170912	0.105433	0.26501	0.0654791	0.0940978		1.5	0.817574
7665	1	1	28.3066	1	0	0		-1.57883	0.291404		0.170962	0.104333	0.267435	0.0666285	0.0964735		1.6	0.832018
7881	1	0	41.2457	0	0	0		-1.57137	0.278485		0.172021	0.107436	0.26395	0.0645849	0.0919285		1.7	0.845535
7809	1	1	28.7009	1	0	0		-1.56921	0.289688		0.172329	0.105552	0.268662	0.0667765	0.0963328		1.8	0.858149
7738	1	1	49.0897	0	1	0		-1.56805	0.304751		0.172495	0.102905	0.274734	0.0695903	0.102239		1.9	0.869892
7664	1	1	29.7413	1	0	0		-1.54384	0.285397		0.175978	0.108785	0.272008	0.0671934	0.0960297		2	0.880797
7644	1	0	26.7871	0	1	0		-1.51107	0.270848		0.180781	0.11487	0.272851	0.0659102	0.0920703		2.1	0.890903
7775	1	1	31.2772	1	0	0		-1.50638	0.279723		0.181476	0.113585	0.277254	0.0678913	0.0957783		2.2	0.90025
7672	1	0	27.0335	0	1	0		-1.50506	0.269694		0.181672	0.115714	0.273595	0.0659582	0.0919227		2.3	0.908877
7678	1	0	27.1567	0	1	0		-1.50205	0.269124		0.182119	0.116136	0.27397	0.0659829	0.0918509		2.4	0.916827
7796	1	1	32.4928	1	0	0		-1.47673	0.275819		0.185921	0.117394	0.281683	0.0685269	0.0957619		2.5	0.924142
7773	1	0	29.7604	0	1	0		-1.43855	0.258309		0.191769	0.125117	0.282465	0.0666522	0.0906953		2.6	0.930862
7650	1	0	29.9877	0	1	0		-1.43301	0.257481		0.19263	0.125903	0.28326	0.0667263	0.09063		2.7	0.937027
7683	1	1	34.4394	1	0	0		-1.42926	0.270707		0.193214	0.123484	0.289323	0.0697303	0.096109		2.8	0.942676
7770	1	1	34.4476	1	0	0		-1.42906	0.270688		0.193245	0.123509	0.289357	0.0697359	0.0961115		2.9	0.947846
7781	1	1	34.4778	1	0	0		-1.42832	0.270621		0.19336	0.123603	0.289481	0.0697565	0.0961207		3	0.952574
7723	1	0	30.7324	0	1	0		-1.41485	0.254907		0.19547	0.12848	0.28593	0.0669904	0.09046		3.1	0.956893
7669	1	0	31.3018	0	1	0		-1.40096	0.253084		0.197663	0.130448	0.288041	0.0672158	0.0903774		3.2	0.960834
7850	1	1	35.9863	1	0	0		-1.39153	0.26769		0.199163	0.128285	0.295908	0.0708778	0.0967448		3.3	0.964429
7749	1	1	56.9747	0	1	0		-1.37575	0.341365		0.201693	0.114577	0.330335	0.0871164	0.128642		3.4	0.967705
7817	1	0	32.4983	0	1	0		-1.37178	0.249677		0.202332	0.134569	0.292677	0.0677628	0.0903453		3.5	0.970688
7793	1	1	57.8782	0	1	0		-1.35371	0.346578		0.205264	0.115781	0.337508	0.0894833	0.132244		3.6	0.973403
7887	1	0	50.6366	0	0	0		-1.34235	0.306666		0.207125	0.125273	0.322724	0.0818511	0.1156		3.7	0.975873
7659	1	0	33.8973	0	1	0		-1.33766	0.246447		0.207895	0.13935	0.298463	0.0685446	0.0905684		3.8	0.978119
7762	1	1	38.8693	1	0	0		-1.32122	0.264649		0.210615	0.137059	0.309489	0.073556	0.0988739		3.9	0.98016
7750	1	0	34.5763	0	1	0		-1.3211	0.245182		0.210635	0.141649	0.301419	0.0689855	0.0907847		4	0.982014
7798	1	0	34.7105	0	1	0		-1.31783	0.244955		0.211179	0.142101	0.302015	0.0690777	0.090836
7847	1	0	51.9945	0	0	0		-1.30923	0.313112		0.212616	0.127536	0.332804	0.0850805	0.120188
7747	1	1	39.6934	1	0	0		-1.30113	0.264412		0.213976	0.139509	0.3137	0.0744665	0.0997242
7867	1	1	40.052	1	0	0		-1.29238	0.264397		0.21545	0.140566	0.31558	0.0748844	0.100129
7836	1	1	23.6112	1	1	0		-1.28042	0.317737		0.217479	0.129749	0.341267	0.0877303	0.123788
7771	1	1	40.7529	1	0	0		-1.27529	0.264522		0.218354	0.142614	0.319337	0.0757401	0.100983
7736	1	0	37.2567	0	1	0		-1.25574	0.242181		0.221709	0.150535	0.314091	0.0711737	0.0923823
7713	1	0	37.7714	0	1	0		-1.24318	0.241975		0.223883	0.152199	0.316715	0.0716831	0.0928322
7768	1	1	25.4401	1	1	0		-1.23582	0.307505		0.225165	0.137226	0.346807	0.0879395	0.121642
7782	1	1	25.922	1	1	0		-1.22406	0.304954		0.227222	0.139221	0.348338	0.0880009	0.121116
7677	1	1	26.1985	1	1	0		-1.21732	0.303518		0.228409	0.140371	0.34923	0.0880378	0.120822
7701	1	0	38.8474	0	1	0		-1.21694	0.241936		0.228475	0.155627	0.322404	0.0728485	0.0939284
7647	1	1	43.384	1	0	0		-1.21112	0.266811		0.229503	0.150068	0.334441	0.0794353	0.104937
7789	1	1	26.4723	1	1	0		-1.21064	0.302117		0.229587	0.141512	0.350124	0.0880759	0.120537
7863	1	0	39.6851	0	1	0		-1.19651	0.24227		0.232097	0.158243	0.327028	0.0738536	0.0949307
7832	1	1	29.6454	1	1	0		-1.13325	0.287487		0.243561	0.154893	0.361287	0.0886679	0.117726
7740	1	0	42.5927	0	1	0		-1.1256	0.245882		0.244974	0.166932	0.344417	0.078042	0.099443
7826	1	1	30.1328	1	1	0		-1.12137	0.285518		0.245757	0.156965	0.363142	0.0887922	0.117384
7752	1	0	42.7789	0	1	0		-1.12106	0.24624		0.245815	0.167467	0.345602	0.0783484	0.0997871
7651	1	1	48.1807	1	0	0		-1.09414	0.278092		0.25084	0.162575	0.366079	0.0882658	0.115239
7764	1	1	48.2519	1	0	0		-1.0924	0.278325		0.251167	0.162749	0.366588	0.0884179	0.115421
7666	1	1	48.282	1	0	0		-1.09166	0.278424		0.251305	0.162823	0.366804	0.0884824	0.115499
7769	1	0	44.2875	0	1	0		-1.08427	0.249691		0.252699	0.171695	0.355518	0.0810044	0.102818
7864	1	1	48.731	1	0	0		-1.08071	0.279937		0.253371	0.163914	0.370042	0.0894571	0.116671
7778	1	0	44.6543	0	1	0		-1.07532	0.250675		0.254393	0.172696	0.358013	0.0816971	0.103621
7754	1	0	44.6626	0	1	0		-1.07512	0.250697		0.254431	0.172718	0.35807	0.0817129	0.103639
7638	1	1	32.5859	1	1	0		-1.06154	0.276835		0.257015	0.167404	0.373099	0.089611	0.116084
7656	1	1	49.8453	1	0	0		-1.05354	0.283998		0.258546	0.166565	0.378269	0.0919817	0.119723
7693	1	0	25.347	1	0	0		-1.05011	0.307476		0.259204	0.160736	0.389965	0.098468	0.130761
7807	1	0	45.9521	0	1	0		-1.04367	0.254592		0.260442	0.176148	0.367102	0.0842949	0.106659
7758	1	1	33.6591	1	1	0		-1.03537	0.273713		0.262045	0.171953	0.377802	0.0900914	0.115757
7686	1	0	26.1164	1	0	0		-1.03135	0.303811		0.262823	0.164267	0.392724	0.0985561	0.129901
7852	1	0	46.4942	0	1	0		-1.03045	0.256424		0.262997	0.177549	0.371017	0.0854479	0.10802
7916	1	1	33.9959	1	1	0		-1.02716	0.272822		0.263636	0.173376	0.379323	0.09026	0.115687
7681	1	1	34.0205	1	1	0		-1.02655	0.272759		0.263753	0.17348	0.379435	0.0902727	0.115682
7838	1	0	26.9103	1	0	0		-1.01198	0.30021		0.266592	0.167926	0.395662	0.0986655	0.129071
7711	1	1	52.0465	1	0	0		-0.999854	0.293228		0.26897	0.171564	0.395291	0.0974058	0.12632
7642	1	1	35.6304	1	1	0		-0.987293	0.269117		0.271447	0.180234	0.387028	0.091213	0.115581
7653	1	0	28.4901	1	0	0		-0.973457	0.293619		0.274192	0.175238	0.401802	0.0989541	0.12761
7671	1	0	28.7529	1	0	0		-0.967047	0.292599		0.275469	0.176457	0.402862	0.099013	0.127393
7748	1	0	49.2813	0	1	0		-0.962476	0.267568		0.276383	0.184386	0.392208	0.0919967	0.115825
7873	1	1	37.3908	1	1	0		-0.944359	0.266309		0.280021	0.187502	0.395944	0.0925187	0.115923
7822	1	0	50.0452	0	1	0		-0.943847	0.271095		0.280124	0.186155	0.398312	0.0939693	0.118189
7708	1	1	37.4237	1	1	0		-0.943558	0.266268		0.280182	0.187636	0.396117	0.0925461	0.115935
7691	1	1	54.9979	1	0	0		-0.927875	0.307903		0.283356	0.177794	0.419607	0.105562	0.136251
7714	1	1	38.935	1	1	0		-0.9067	0.264885		0.287676	0.193742	0.404313	0.0939335	0.116638
7746	1	1	39.5592	1	1	0		-0.891476	0.26459		0.290805	0.196223	0.407845	0.0945827	0.11704
7868	1	0	52.5175	0	1	0		-0.883553	0.283765		0.292442	0.191587	0.41888	0.100855	0.126438
7684	1	1	40.011	1	1	0		-0.880459	0.264478		0.293083	0.198001	0.410455	0.0950817	0.117373
7875	1	1	57.1828	1	0	0		-0.874592	0.320268		0.2943	0.18208	0.438595	0.11222	0.144295
7751	1	0	52.9117	0	1	0		-0.873938	0.285952		0.294436	0.192414	0.422267	0.102022	0.127832
7866	1	0	35.0198	1	0	0		-0.814208	0.275453		0.306995	0.205201	0.431847	0.101793	0.124852
7676	1	0	18.1081	1	1	0		-0.813732	0.340833		0.307096	0.185161	0.463639	0.121935	0.156544
7851	1	0	35.1431	1	0	0		-0.811203	0.275263		0.307634	0.205753	0.432493	0.101881	0.124859
7848	1	0	55.5264	0	1	0		-0.810171	0.301493		0.307854	0.197642	0.445407	0.110212	0.137553
7716	1	0	55.6057	0	1	0		-0.808235	0.301991		0.308267	0.197794	0.446127	0.110473	0.13786
7892	1	1	60.1342	1	0	0		-0.802612	0.338728		0.309467	0.187472	0.465379	0.121995	0.155912
7674	1	0	55.8877	0	1	0		-0.801358	0.303774		0.309735	0.198332	0.448691	0.111404	0.138956
7761	1	1	43.4387	1	1	0		-0.796861	0.26639		0.310697	0.210987	0.431744	0.0997101	0.121047
7687	1	0	56.3888	0	1	0		-0.789138	0.306985		0.312354	0.199275	0.453275	0.113078	0.140921
7839	1	0	36.0849	1	0	0		-0.788234	0.274008		0.312548	0.209939	0.437534	0.102609	0.124986
7797	1	0	56.7201	0	1	0		-0.781059	0.30914		0.314092	0.199891	0.456325	0.1142	0.142234
7654	1	1	44.1314	1	1	0		-0.779968	0.267364		0.314327	0.213492	0.436363	0.100834	0.122036
7689	1	0	57.2074	0	1	0		-0.769174	0.312353		0.316658	0.200787	0.46084	0.115871	0.144182
7742	1	0	20.0493	1	1	0		-0.766391	0.327857		0.31726	0.196393	0.469092	0.120867	0.151832
7712	1	1	63.0363	1	0	0		-0.731835	0.35857		0.324792	0.192378	0.492741	0.132414	0.167949
7786	1	0	59.1211	0	1	0		-0.722501	0.325441		0.326843	0.204181	0.478854	0.122662	0.152011
7879	1	0	39.3648	1	0	0		-0.708242	0.27241		0.329987	0.224059	0.45653	0.105928	0.126543
7657	1	0	23.2252	1	1	0		-0.688937	0.308362		0.33427	0.21529	0.478876	0.118979	0.144606
7869	1	1	49.0376	1	1	0		-0.660314	0.279635		0.340669	0.229985	0.471972	0.110684	0.131303
7774	1	0	41.8782	1	0	0		-0.646946	0.274124		0.343678	0.234293	0.472612	0.109385	0.128934
7855	1	1	50.4394	1	1	0		-0.626128	0.28476		0.348389	0.234287	0.483007	0.114102	0.134618
7825	1	0	25.8754	1	1	0		-0.624302	0.294007		0.348804	0.231376	0.48799	0.117427	0.139187
7818	1	1	69.7604	1	0	0		-0.567845	0.409596		0.361734	0.202514	0.558472	0.15922	0.196738
7780	1	0	28.6379	1	1	0		-0.55693	0.281205		0.364258	0.248227	0.498558	0.116031	0.1343
7655	1	0	28.9336	1	1	0		-0.549719	0.279978		0.36593	0.250026	0.499759	0.115904	0.13383
7705	1	0	29.6756	1	1	0		-0.531624	0.277029		0.370138	0.254529	0.502838	0.115609	0.1327
7924	1	0	46.6393	1	0	0		-0.530831	0.284145		0.370323	0.252041	0.506523	0.118282	0.1362
7682	1	0	47.9781	1	0	0		-0.49818	0.288466		0.377968	0.256627	0.516797	0.121341	0.138828
7728	1	0	31.9179	1	1	0		-0.476938	0.269292		0.382975	0.268008	0.512716	0.114967	0.129741
7816	1	0	31.9288	1	1	0		-0.476671	0.269259		0.383038	0.268073	0.512766	0.114965	0.129728
7641	1	0	31.9452	1	1	0		-0.476271	0.269209		0.383133	0.268171	0.512842	0.114962	0.129709
7646	1	0	49.0349	1	0	0		-0.472406	0.292309		0.384047	0.260123	0.525109	0.123924	0.141062
7645	1	1	74.1875	1	0	0		-0.459876	0.446117		0.387015	0.208455	0.60217	0.17856	0.215154
7854	1	0	32.8296	1	1	0		-0.454703	0.266678		0.388243	0.27341	0.51699	0.114834	0.128747
7688	1	0	34.527	1	1	0		-0.413305	0.262672		0.39812	0.283302	0.525361	0.114818	0.127241
7700	1	0	34.9295	1	1	0		-0.40349	0.261891		0.400474	0.285611	0.527427	0.114863	0.126953
7745	1	0	52.5065	1	0	0		-0.38774	0.307426		0.404261	0.270854	0.553498	0.133408	0.149237
7791	1	0	36.8186	1	1	0		-0.357418	0.259118		0.411585	0.296236	0.537543	0.115349	0.125958
7905	1	0	54.3381	1	0	0		-0.343071	0.316805		0.415064	0.276076	0.569023	0.138987	0.153959
7925	1	0	37.9658	1	1	0		-0.329441	0.258164		0.418377	0.302495	0.544026	0.115881	0.125649
7823	1	0	40.5613	1	1	0		-0.266142	0.258078		0.433855	0.316052	0.559637	0.117802	0.125783
7637	1	0	42.0999	1	1	0		-0.228616	0.259383		0.443094	0.323659	0.569491	0.119434	0.126397
7675	1	0	44.2683	1	1	0		-0.175734	0.262902		0.456179	0.333806	0.584082	0.122373	0.127903
7715	1	0	49.963	1	1	0		-0.0368495	0.280862		0.490789	0.357246	0.625659	0.133543	0.134871
7808	1	0	50.2615	1	1	0		-0.0295715	0.282121		0.492608	0.358351	0.627939	0.134257	0.135332
7859	1	0	50.6393	1	1	0		-0.020357	0.283757		0.494911	0.359733	0.630837	0.135178	0.135926
7840	1	0	52.679	1	1	0		0.0293875	0.293361		0.507346	0.366886	0.646656	0.14046	0.13931
7685	1	0	54.1684	1	1	0		0.065711	0.301143		0.516422	0.371794	0.65835	0.144628	0.141928
7709	1	0	54.7461	1	1	0		0.0797997	0.304324		0.519939	0.37363	0.662907	0.14631	0.142968
7707	1	0	57.7604	1	1	0		0.153315	0.322271		0.538254	0.382645	0.686749	0.155609	0.148496
7870	1	0	58.8145	1	1	0		0.179022	0.329035		0.544636	0.38559	0.69507	0.159046	0.150434
7753	1	0	60.3833	1	1	0		0.217282	0.339521		0.554108	0.389794	0.70739	0.164314	0.153282
7871	1	0	35.3155	0	1	1		0.229707	0.502712		0.557175	0.3196	0.771186	0.237575	0.214011
7885	1	1	40.6735	1	0	1		0.255561	0.440361		0.563545	0.352619	0.753742	0.210926	0.190197
7804	1	1	43.8193	1	0	1		0.332281	0.438373		0.582314	0.371233	0.767008	0.211081	0.184694
7667	1	1	30.5955	1	1	1		0.422698	0.476495		0.604129	0.374905	0.795211	0.229224	0.191082
7719	1	0	23.6632	1	0	1		0.441608	0.508525		0.608642	0.364682	0.808194	0.24396	0.199552
7886	1	1	48.512	1	0	1		0.446727	0.440025		0.609861	0.397541	0.787375	0.21232	0.177514
7907	1	0	26.1081	1	0	1		0.501235	0.498436		0.622749	0.383268	0.814296	0.239481	0.191546
7784	1	1	51.1184	1	0	1		0.510293	0.443312		0.624875	0.411299	0.79886	0.213576	0.173985
7898	1	1	40.4791	1	1	1		0.663742	0.453914		0.6601	0.443757	0.825406	0.216344	0.165306
7906	1	1	40.9665	1	1	1		0.675627	0.453386		0.662762	0.446948	0.826964	0.215814	0.164202
7680	1	1	47.4223	1	1	1		0.833073	0.451845		0.697004	0.486867	0.84796	0.210137	0.150956
7884	1	1	64.9336	1	0	1		0.84722	0.486766		0.699984	0.473315	0.858305	0.226668	0.158321
7787	1	1	58.6229	1	1	1		1.10623	0.472817		0.751426	0.544758	0.884214	0.206668	0.132788
7861	1	1	60.7775	1	1	1		1.15878	0.480063		0.761112	0.55425	0.890875	0.206861	0.129763
7894	1	0	55.3238	1	0	1		1.21375	0.4786		0.770962	0.56849	0.895837	0.202471	0.124876
7891	1	0	56.3066	1	0	1		1.23772	0.481331		0.775167	0.573051	0.898542	0.202116	0.123375
7692	1	0	40.0684	1	1	1		1.25462	0.468824		0.778099	0.583152	0.897846	0.194947	0.119747
7938	1	0	57.3415	1	0	1		1.26296	0.484428		0.779535	0.577735	0.901361	0.2018	0.121826
7639	1	0	55.7372	1	1	1		1.63675	0.482521		0.837093	0.666192	0.929726	0.170901	0.0926338

## Sheet: PRNT50>=80
ID	Intercept	sex (0=female, 1=male)	age (in years)	fever (0=no, 1=yes)	anosmia.or.dysgeusia (0=no, 1=yes)	hospitalized (0=no, 1=yes)		lp	SE		Pr(PRNT50>=1:80)	95% Confidence Interval		-	+		lp	Probability							covariance matrix
7772	1	1	24.0794	0	0	0		-1.59511	0.313369		0.168667	0.0989177	0.272713	0.0697491	0.104046		-4	0.0179862			Coef	SE	Intercept	sex	age	fever	anosmia.or.dysgeusia	hospitalized
7663	1	1	28.5886	0	0	0		-1.48513	0.294385		0.184653	0.112833	0.287381	0.0718207	0.102728		-3.9	0.0198403		Intercept	-1.58146	0.464868	0.216102	-0.0186437	-0.00406897	-0.0234952	-0.0334372	0.016182
7727	1	1	28.9637	0	0	0		-1.47599	0.293096		0.186034	0.114007	0.288739	0.0720279	0.102704		-3.8	0.0218813		sex	-0.600896	0.238581	-0.0186437	0.0569207	-0.000114827	-0.0101813	0.00393439	-0.00838024
7718	1	1	30.0096	0	0	0		-1.45048	0.289752		0.189928	0.117285	0.292647	0.0726426	0.102719		-3.7	0.024127		age	0.0243882	0.0105021	-0.00406897	-0.000114827	0.000110295	-0.00010493	-4.51725e-05	-0.000528456
7899	1	1	30.9131	0	0	0		-1.42844	0.287171		0.193341	0.120119	0.296173	0.0732218	0.102832		-3.6	0.026597		fever	0.909001	0.246205	-0.0234952	-0.0101813	-0.00010493	0.0606171	0.00510379	-0.017423
7734	1	1	31.3895	0	0	0		-1.41683	0.285928		0.19516	0.121613	0.29809	0.0735467	0.102931		-3.5	0.0293122		anosmia.or.dysgeusia	0.412921	0.234924	-0.0334372	0.00393439	-4.51725e-05	0.00510379	0.0551894	0.00596933
7805	1	1	35.0335	0	0	0		-1.32795	0.279212		0.209498	0.13294	0.314169	0.076558	0.104671		-3.4	0.0322955		hospitalized	1.53278	0.445056	0.016182	-0.00838024	-0.000528456	-0.017423	0.00596933	0.198075
7834	1	1	37.0815	0	0	0		-1.27801	0.277691		0.217889	0.13916	0.324376	0.0787292	0.106486		-3.3	0.0355712
7722	1	1	38.3409	0	0	0		-1.24729	0.27758		0.223169	0.142907	0.331095	0.0802617	0.107926		-3.2	0.0391657
7679	1	1	22.5982	0	1	0		-1.21831	0.311625		0.228234	0.138346	0.352625	0.0898881	0.12439		-3.1	0.0431073
7704	1	1	23.2526	0	1	0		-1.20235	0.308034		0.231058	0.141111	0.354664	0.089947	0.123606		-3	0.0474259
7703	1	1	23.6715	0	1	0		-1.19213	0.305794		0.232878	0.14289	0.355998	0.0899875	0.12312		-2.9	0.0521536
7776	1	1	40.627	0	0	0		-1.19154	0.278986		0.232983	0.149522	0.344178	0.0834611	0.111195		-2.8	0.0573242
7721	1	1	41.2786	0	0	0		-1.17565	0.279762		0.235835	0.151359	0.34812	0.0844766	0.112284		-2.7	0.0629734
7720	1	1	26.4832	0	1	0		-1.12356	0.292032		0.245352	0.154996	0.365591	0.0903556	0.12024		-2.6	0.0691384
7788	1	1	43.54	0	0	0		-1.1205	0.283725		0.245919	0.157546	0.362531	0.0883728	0.116612		-2.5	0.0758582
7755	1	0	19.436	0	0	0		-1.10745	0.315592		0.248346	0.151098	0.380154	0.0972477	0.131808		-2.4	0.0831727
7695	1	1	27.5318	0	1	0		-1.09799	0.287508		0.250117	0.159561	0.369475	0.0905568	0.119357		-2.3	0.091123
7897	1	0	19.9179	0	0	0		-1.0957	0.312679		0.250546	0.153352	0.381579	0.0971946	0.131033		-2.2	0.0997505
7699	1	1	28.5695	0	1	0		-1.07268	0.283381		0.254894	0.16409	0.373495	0.090804	0.118601		-2.1	0.109097
7757	1	1	29.3005	0	1	0		-1.05485	0.280692		0.258295	0.167283	0.376438	0.0910117	0.118143		-2	0.119203
7668	1	1	29.7741	0	1	0		-1.0433	0.279048		0.260514	0.169351	0.378395	0.0911629	0.117881		-1.9	0.130108
7909	1	0	22.0808	0	0	0		-1.04295	0.30031		0.260581	0.163617	0.388328	0.0969638	0.127747		-1.8	0.141851
7648	1	0	23.436	0	0	0		-1.0099	0.29319		0.266999	0.170152	0.392874	0.0968478	0.125875		-1.7	0.154465
7790	1	1	48.1177	0	0	0		-1.00885	0.297445		0.267204	0.169124	0.395115	0.0980798	0.127911		-1.6	0.167982
7662	1	1	48.2902	0	0	0		-1.00465	0.298101		0.268028	0.169535	0.396428	0.0984935	0.1284		-1.5	0.182426
7660	1	1	32.0986	0	1	0		-0.986612	0.272159		0.271582	0.179455	0.388605	0.0921267	0.117023		-1.4	0.197816
7661	1	0	24.8816	0	0	0		-0.974645	0.286182		0.273956	0.177181	0.398019	0.0967743	0.124063		-1.3	0.214165
7640	1	0	25.3854	0	0	0		-0.96236	0.28389		0.276406	0.179641	0.399887	0.0967654	0.123481		-1.2	0.231475
7649	1	1	33.1472	0	1	0		-0.961038	0.269718		0.27667	0.183969	0.393555	0.0927013	0.116885		-1.1	0.24974
7824	1	0	25.5086	0	0	0		-0.959355	0.283342		0.277007	0.180243	0.400351	0.0967648	0.123343		-1	0.268941
7739	1	0	27.5264	0	0	0		-0.910145	0.275073		0.28697	0.190111	0.408299	0.0968589	0.121329		-0.9	0.28905
7652	1	0	28.3915	0	0	0		-0.889045	0.271956		0.291307	0.194336	0.411926	0.0969711	0.120619		-0.8	0.310026
7694	1	1	37.2813	0	1	0		-0.860214	0.264376		0.297295	0.201267	0.415315	0.0960272	0.11802		-0.7	0.331812
7802	1	0	29.8371	0	0	0		-0.85379	0.267358		0.298638	0.201361	0.418297	0.0972776	0.119658		-0.6	0.354344
7670	1	0	30.6229	0	0	0		-0.834626	0.265189		0.302668	0.205152	0.42193	0.0975154	0.119262		-0.5	0.377541
7717	1	0	31.0801	0	0	0		-0.823476	0.264038		0.305026	0.207347	0.424101	0.0976792	0.119075		-0.4	0.401312
7702	1	0	31.2389	0	0	0		-0.819603	0.263658		0.305848	0.208107	0.424865	0.0977407	0.119017		-0.3	0.425557
7908	1	0	31.5127	0	0	0		-0.812926	0.263025		0.307267	0.209415	0.426194	0.0978524	0.118927		-0.2	0.450166
7756	1	0	31.8138	0	0	0		-0.805581	0.262364		0.308833	0.210849	0.427674	0.0979838	0.118841		-0.1	0.475021
7690	1	0	32.5065	0	0	0		-0.788688	0.260983		0.31245	0.214129	0.43115	0.0983215	0.118699		0	0.5
7706	1	1	40.293	0	1	0		-0.786765	0.264934		0.312864	0.213151	0.433522	0.0997129	0.120659		0.1	0.524979
7732	1	1	42.7159	0	1	0		-0.727673	0.268105		0.325706	0.222154	0.449625	0.103552	0.123919		0.2	0.549834
7741	1	1	43.0856	0	1	0		-0.718659	0.268797		0.327688	0.22348	0.452192	0.104209	0.124504		0.3	0.574443
7865	1	0	35.9918	0	0	0		-0.703688	0.257061		0.330995	0.230139	0.450203	0.100856	0.119208		0.4	0.598688
7744	1	0	36.2245	0	0	0		-0.698013	0.256983		0.332253	0.231173	0.451571	0.10108	0.119318		0.5	0.622459
7673	1	1	43.9535	0	1	0		-0.697492	0.270635		0.332368	0.226543	0.458335	0.105826	0.125966		0.6	0.645656
7763	1	0	36.5914	0	0	0		-0.689065	0.256906		0.334241	0.232794	0.45375	0.101447	0.119509		0.7	0.668188
7658	1	1	44.3231	0	1	0		-0.688478	0.271506		0.334372	0.227825	0.460998	0.106546	0.126626		0.8	0.689974
7643	1	1	24.7118	1	0	0		-0.670681	0.290498		0.338344	0.224426	0.474696	0.113918	0.136351		0.9	0.71095
7926	1	1	25.347	1	0	0		-0.65519	0.287138		0.341821	0.228292	0.476916	0.113529	0.135096		1	0.731059
7779	1	1	45.8316	0	1	0		-0.651687	0.275603		0.342609	0.232925	0.472152	0.109685	0.129543		1.1	0.75026
7698	1	0	39.3539	0	0	0		-0.621693	0.258185		0.349396	0.244579	0.47112	0.104817	0.121723		1.2	0.768525
7803	1	0	39.4524	0	0	0		-0.619289	0.258291		0.349943	0.244985	0.47177	0.104958	0.121827		1.3	0.785835
7733	1	0	39.6879	0	0	0		-0.613547	0.25856		0.35125	0.245951	0.473333	0.105299	0.122082		1.4	0.802184
7880	1	0	23.9945	0	1	0		-0.583358	0.265489		0.35816	0.249044	0.484255	0.109116	0.126095		1.5	0.817574
7665	1	1	28.3066	1	0	0		-0.58301	0.273087		0.35824	0.246334	0.488062	0.111906	0.129822		1.6	0.832018
7881	1	0	41.2457	0	0	0		-0.575554	0.260925		0.359956	0.25219	0.48397	0.107766	0.124014		1.7	0.845535
7809	1	1	28.7009	1	0	0		-0.573395	0.271429		0.360454	0.24873	0.489653	0.111723	0.129199		1.8	0.858149
7738	1	1	49.0897	0	1	0		-0.57223	0.287246		0.360722	0.243197	0.497693	0.117526	0.136971		1.9	0.869892
7664	1	1	29.7413	1	0	0		-0.548022	0.267312		0.366323	0.255032	0.493978	0.111292	0.127654		2	0.880797
7644	1	0	26.7871	0	1	0		-0.515251	0.251291		0.373963	0.267414	0.49432	0.106549	0.120357		2.1	0.890903
7775	1	1	31.2772	1	0	0		-0.510563	0.261951		0.375061	0.264251	0.500715	0.11081	0.125654		2.2	0.90025
7672	1	0	27.0335	0	1	0		-0.509242	0.250165		0.375371	0.269027	0.495271	0.106344	0.119899		2.3	0.908877
7678	1	0	27.1567	0	1	0		-0.506237	0.24961		0.376076	0.269832	0.49575	0.106244	0.119674		2.4	0.916827
7796	1	1	32.4928	1	0	0		-0.480917	0.258344		0.382036	0.271451	0.506359	0.110584	0.124323		2.5	0.924142
7773	1	0	29.7604	0	1	0		-0.442738	0.23922		0.391089	0.286671	0.506533	0.104418	0.115444		2.6	0.930862
7650	1	0	29.9877	0	1	0		-0.437196	0.238441		0.392409	0.288118	0.507537	0.104291	0.115127		2.7	0.937027
7683	1	1	34.4394	1	0	0		-0.433443	0.253801		0.393305	0.282744	0.515996	0.110561	0.122692		2.8	0.942676
7770	1	1	34.4476	1	0	0		-0.433242	0.253785		0.393352	0.282791	0.516039	0.110562	0.122686		2.9	0.947846
7781	1	1	34.4778	1	0	0		-0.432508	0.253727		0.393528	0.282963	0.516194	0.110565	0.122666		3	0.952574
7723	1	0	30.7324	0	1	0		-0.419034	0.236038		0.396748	0.292832	0.510898	0.103916	0.11415		3.1	0.956893
7669	1	0	31.3018	0	1	0		-0.405146	0.23436		0.400077	0.296402	0.513546	0.103675	0.11347		3.2	0.960834
7850	1	1	35.9863	1	0	0		-0.395717	0.251321		0.402342	0.291459	0.524199	0.110882	0.121857		3.3	0.964429
7749	1	1	56.9747	0	1	0		-0.379929	0.328726		0.406144	0.264204	0.565711	0.14194	0.159567		3.4	0.967705
7817	1	0	32.4983	0	1	0		-0.375967	0.231298		0.4071	0.303791	0.519335	0.103309	0.112235		3.5	0.970688
7793	1	1	57.8782	0	1	0		-0.357894	0.334461		0.411469	0.266308	0.573868	0.145162	0.162398		3.6	0.973403
7887	1	0	50.6366	0	0	0		-0.346529	0.294666		0.414224	0.284129	0.557498	0.130096	0.143274		3.7	0.975873
7659	1	0	33.8973	0	1	0		-0.341847	0.228544		0.415361	0.312213	0.5265	0.103148	0.111139		3.8	0.978119
7762	1	1	38.8693	1	0	0		-0.325407	0.249472		0.419359	0.30696	0.540798	0.112399	0.12144		3.9	0.98016
7750	1	0	34.5763	0	1	0		-0.325287	0.227538		0.419388	0.316206	0.530135	0.103182	0.110747		4	0.982014
7798	1	0	34.7105	0	1	0		-0.322016	0.227365		0.420185	0.316987	0.530866	0.103197	0.110681
7847	1	0	51.9945	0	0	0		-0.313411	0.301908		0.422282	0.287993	0.569137	0.134289	0.146854
7747	1	1	39.6934	1	0	0		-0.305309	0.249616		0.42426	0.311191	0.545855	0.113069	0.121595
7867	1	1	40.052	1	0	0		-0.296562	0.249773		0.426398	0.313003	0.548099	0.113395	0.121701
7836	1	1	23.6112	1	1	0		-0.284601	0.303681		0.429326	0.293216	0.577035	0.13611	0.147709
7771	1	1	40.7529	1	0	0		-0.279468	0.250242		0.430584	0.316491	0.552557	0.114093	0.121973
7736	1	0	37.2567	0	1	0		-0.259918	0.225732		0.435384	0.331291	0.545503	0.104093	0.110119
7713	1	0	37.7714	0	1	0		-0.247365	0.225785		0.438472	0.334054	0.548639	0.104418	0.110167
7768	1	1	25.4401	1	1	0		-0.239998	0.293708		0.440287	0.306685	0.583138	0.133602	0.142851
7782	1	1	25.922	1	1	0		-0.228246	0.291234		0.443185	0.310226	0.584815	0.132959	0.14163
7677	1	1	26.1985	1	1	0		-0.221503	0.289845		0.44485	0.312255	0.585791	0.132595	0.140942
7701	1	0	38.8474	0	1	0		-0.221124	0.226314		0.444943	0.339684	0.555385	0.105259	0.110442
7647	1	1	43.384	1	0	0		-0.215301	0.253908		0.446382	0.328945	0.570124	0.117437	0.123743
7789	1	1	26.4723	1	1	0		-0.214825	0.288492		0.446499	0.314262	0.586767	0.132237	0.140268
7863	1	0	39.6851	0	1	0		-0.200692	0.227115		0.449995	0.343928	0.560811	0.106067	0.110816
7832	1	1	29.6454	1	1	0		-0.137438	0.274524		0.465695	0.337265	0.598839	0.128429	0.133144
7740	1	0	42.5927	0	1	0		-0.129781	0.232471		0.4676	0.357685	0.580752	0.109915	0.113152
7826	1	1	30.1328	1	1	0		-0.125552	0.272676		0.468653	0.34074	0.600822	0.127913	0.132169
7752	1	0	42.7789	0	1	0		-0.125241	0.232946		0.468731	0.358515	0.582084	0.110216	0.113353
7651	1	1	48.1807	1	0	0		-0.0983183	0.267896		0.47544	0.34901	0.605099	0.12643	0.129659
7764	1	1	48.2519	1	0	0		-0.0965823	0.268169		0.475873	0.349283	0.605642	0.126591	0.129769
7666	1	1	48.282	1	0	0		-0.0958478	0.268286		0.476056	0.349398	0.605872	0.126659	0.129815
7769	1	0	44.2875	0	1	0		-0.0884501	0.237356		0.477902	0.365014	0.593093	0.112888	0.115191
7864	1	1	48.731	1	0	0		-0.0848973	0.270056		0.478788	0.3511	0.60931	0.127688	0.130521
7778	1	0	44.6543	0	1	0		-0.0795028	0.238575		0.480135	0.366535	0.595826	0.113599	0.115691
7754	1	0	44.6626	0	1	0		-0.0793025	0.238603		0.480185	0.366569	0.595888	0.113616	0.115703
7638	1	1	32.5859	1	1	0		-0.0657255	0.264686		0.483575	0.357895	0.611366	0.125679	0.127792
7656	1	1	49.8453	1	0	0		-0.0577214	0.27475		0.485574	0.355206	0.617934	0.130367	0.13236
7693	1	0	25.347	1	0	0		-0.0542936	0.298326		0.48643	0.34547	0.629582	0.14096	0.143152
7807	1	0	45.9521	0	1	0		-0.0478532	0.243328		0.488039	0.371736	0.605652	0.116303	0.117613
7758	1	1	33.6591	1	1	0		-0.0395512	0.261912		0.490113	0.365192	0.616282	0.124921	0.126168
7686	1	0	26.1164	1	0	0		-0.0355309	0.294861		0.491118	0.351271	0.63237	0.139848	0.141252
7852	1	0	46.4942	0	1	0		-0.0346326	0.245511		0.491343	0.373827	0.609823	0.117516	0.11848
7916	1	1	33.9959	1	1	0		-0.0313383	0.261135		0.492166	0.367452	0.617863	0.124714	0.125697
7681	1	1	34.0205	1	1	0		-0.0307374	0.26108		0.492316	0.367617	0.617979	0.1247	0.125663
7838	1	0	26.9103	1	0	0		-0.0161672	0.291477		0.495958	0.357217	0.635324	0.138741	0.139366
7711	1	1	52.0465	1	0	0		-0.00403744	0.285209		0.498991	0.362843	0.635289	0.136148	0.136298
7642	1	1	35.6304	1	1	0		0.00852407	0.258024		0.502131	0.378198	0.625802	0.123933	0.123671
7653	1	0	28.4901	1	0	0		0.0223597	0.285349		0.50559	0.368903	0.641446	0.136687	0.135856
7671	1	0	28.7529	1	0	0		0.0287698	0.284411		0.507192	0.370826	0.642496	0.136366	0.135304
7748	1	0	49.2813	0	1	0		0.0333405	0.258426		0.508334	0.383865	0.631779	0.124469	0.123445
7873	1	1	37.3908	1	1	0		0.0514579	0.255921		0.512862	0.389326	0.634846	0.123536	0.121984
7822	1	0	50.0452	0	1	0		0.0519696	0.262426		0.512989	0.38642	0.637914	0.126569	0.124925
7708	1	1	37.4237	1	1	0		0.0522592	0.255894		0.513062	0.389529	0.635019	0.123533	0.121958
7691	1	1	54.9979	1	0	0		0.0679419	0.301454		0.516979	0.372173	0.658989	0.144806	0.14201
7714	1	1	38.935	1	1	0		0.0891169	0.255167		0.522264	0.39867	0.643192	0.123595	0.120927
7746	1	1	39.5592	1	1	0		0.104341	0.255154		0.526062	0.402331	0.646672	0.12373	0.120611
7868	1	0	52.5175	0	1	0		0.112264	0.276571		0.528037	0.394171	0.657988	0.133866	0.129952
7684	1	1	40.011	1	1	0		0.115358	0.25525		0.528808	0.404938	0.649228	0.12387	0.120421
7875	1	1	57.1828	1	0	0		0.121225	0.314908		0.530269	0.378483	0.676656	0.151787	0.146386
7751	1	0	52.9117	0	1	0		0.121879	0.278983		0.530432	0.395338	0.661209	0.135094	0.130777
7866	1	0	35.0198	1	0	0		0.181609	0.269546		0.545278	0.414183	0.670383	0.131095	0.125105
7676	1	0	18.1081	1	1	0		0.182085	0.334094		0.545396	0.383968	0.697814	0.161428	0.152418
7851	1	0	35.1431	1	0	0		0.184614	0.269406		0.546023	0.414978	0.670987	0.131045	0.124964
7848	1	0	55.5264	0	1	0		0.185645	0.295955		0.546279	0.402652	0.682594	0.143626	0.136315
7716	1	0	55.6057	0	1	0		0.187582	0.296495		0.546758	0.402863	0.683242	0.143895	0.136484
7892	1	1	60.1342	1	0	0		0.193205	0.334725		0.548151	0.386308	0.700413	0.161843	0.152262
7674	1	0	55.8877	0	1	0		0.194459	0.298424		0.548462	0.403609	0.685544	0.144853	0.137082
7761	1	1	43.4387	1	1	0		0.198955	0.258826		0.549575	0.423519	0.669573	0.126056	0.119998
7687	1	0	56.3888	0	1	0		0.206678	0.301892		0.551486	0.404915	0.689629	0.146572	0.138143
7839	1	0	36.0849	1	0	0		0.207583	0.268546		0.55171	0.420976	0.675668	0.130734	0.123957
7797	1	0	56.7201	0	1	0		0.214758	0.304213		0.553484	0.405765	0.692326	0.147719	0.138842
7654	1	1	44.1314	1	1	0		0.215849	0.260148		0.553754	0.427015	0.67387	0.126739	0.120116
7689	1	0	57.2074	0	1	0		0.226643	0.307667		0.556419	0.406999	0.696285	0.14942	0.139866
7742	1	0	20.0493	1	1	0		0.229426	0.321572		0.557106	0.401107	0.702599	0.155999	0.145493
7712	1	1	63.0363	1	0	0		0.263982	0.355772		0.565615	0.393331	0.723381	0.172284	0.157766
7786	1	0	59.1211	0	1	0		0.273316	0.321662		0.567907	0.411652	0.711724	0.156255	0.143818
7879	1	0	39.3648	1	0	0		0.287575	0.268386		0.571402	0.440665	0.692879	0.130737	0.121476
7657	1	0	23.2252	1	1	0		0.30688	0.302933		0.576124	0.428771	0.711079	0.147353	0.134955
7869	1	1	49.0376	1	1	0		0.335502	0.274896		0.583098	0.449351	0.705639	0.133747	0.122542
7774	1	0	41.8782	1	0	0		0.348871	0.271241		0.586344	0.454436	0.706926	0.131907	0.120583
7855	1	1	50.4394	1	1	0		0.369689	0.280709		0.591384	0.454997	0.715017	0.136387	0.123633
7825	1	0	25.8754	1	1	0		0.371515	0.289409		0.591825	0.451224	0.718848	0.140601	0.127024
7818	1	1	69.7604	1	0	0		0.427972	0.409127		0.605389	0.407595	0.773794	0.197794	0.168405
7780	1	0	28.6379	1	1	0		0.438887	0.277591		0.607994	0.473726	0.727696	0.134268	0.119703
7655	1	0	28.9336	1	1	0		0.446098	0.276477		0.609711	0.476069	0.728691	0.133642	0.11898
7705	1	0	29.6756	1	1	0		0.464193	0.273816		0.614008	0.481887	0.73123	0.132122	0.117222
7924	1	0	46.6393	1	0	0		0.464986	0.28339		0.614196	0.477401	0.735056	0.136795	0.12086
7682	1	0	47.9781	1	0	0		0.497637	0.28828		0.621904	0.483159	0.743199	0.138745	0.121296
7728	1	0	31.9179	1	1	0		0.518879	0.266996		0.626886	0.498891	0.739273	0.127994	0.112387
7816	1	0	31.9288	1	1	0		0.519146	0.266968		0.626948	0.498972	0.739313	0.127976	0.112365
7641	1	0	31.9452	1	1	0		0.519546	0.266925		0.627042	0.499093	0.739374	0.127948	0.112333
7646	1	0	49.0349	1	0	0		0.523411	0.292559		0.627945	0.487501	0.749665	0.140444	0.12172
7645	1	1	74.1875	1	0	0		0.535941	0.446878		0.630868	0.415824	0.804053	0.215043	0.173185
7854	1	0	32.8296	1	1	0		0.541113	0.264773		0.632071	0.505539	0.742704	0.126532	0.110632
7688	1	0	34.527	1	1	0		0.582512	0.261518		0.641645	0.517477	0.749339	0.124168	0.107693
7700	1	0	34.9295	1	1	0		0.592327	0.26092		0.643899	0.52022	0.750958	0.123679	0.107059
7745	1	0	52.5065	1	0	0		0.608076	0.309016		0.647502	0.500601	0.770961	0.146901	0.12346
7791	1	0	36.8186	1	1	0		0.638399	0.259013		0.654391	0.532637	0.758791	0.121755	0.1044
7905	1	0	54.3381	1	0	0		0.652746	0.319038		0.657629	0.506857	0.78212	0.150772	0.124491
7925	1	0	37.9658	1	1	0		0.666376	0.258592		0.660691	0.539799	0.763726	0.120892	0.103035
7823	1	0	40.5613	1	1	0		0.729675	0.259709		0.674734	0.554939	0.775339	0.119795	0.100605
7637	1	0	42.0999	1	1	0		0.767201	0.261713		0.682915	0.563221	0.782477	0.119694	0.0995616
7675	1	0	44.2683	1	1	0		0.820083	0.266181		0.694254	0.574044	0.792785	0.12021	0.0985315
7715	1	0	49.963	1	1	0		0.958967	0.286332		0.722915	0.598148	0.820565	0.124767	0.0976497
7808	1	0	50.2615	1	1	0		0.966245	0.287692		0.72437	0.599257	0.822024	0.125114	0.0976537
7859	1	0	50.6393	1	1	0		0.97546	0.289454		0.726206	0.60064	0.82387	0.125567	0.0976634
7840	1	0	52.679	1	1	0		1.0252	0.299692		0.735985	0.607736	0.833772	0.128249	0.0977871
7685	1	0	54.1684	1	1	0		1.06153	0.307896		0.742982	0.612552	0.840909	0.13043	0.0979261
7709	1	0	54.7461	1	1	0		1.07562	0.311231		0.745664	0.614343	0.843649	0.131321	0.097985
7707	1	0	57.7604	1	1	0		1.14913	0.3299		0.759352	0.623053	0.857629	0.136299	0.0982768
7870	1	0	58.8145	1	1	0		1.17484	0.336887		0.764018	0.62587	0.862372	0.138148	0.098354
7753	1	0	60.3833	1	1	0		1.2131	0.347677		0.770847	0.629868	0.869273	0.140979	0.0984263
7871	1	0	35.3155	0	1	1		1.22552	0.506401		0.773034	0.557982	0.90186	0.215052	0.128826
7885	1	1	40.6735	1	0	1		1.25138	0.445459		0.777538	0.593458	0.89326	0.184081	0.115721
7804	1	1	43.8193	1	0	1		1.3281	0.444344		0.790526	0.612346	0.900161	0.17818	0.109635
7667	1	1	30.5955	1	1	1		1.41851	0.481535		0.805105	0.616497	0.913909	0.188608	0.108803
7719	1	0	23.6632	1	0	1		1.43742	0.514331		0.808056	0.605715	0.920233	0.20234	0.112177
7886	1	1	48.512	1	0	1		1.44254	0.447236		0.808848	0.637831	0.910449	0.171017	0.1016
7907	1	0	26.1081	1	0	1		1.49705	0.504939		0.817134	0.62419	0.923206	0.192944	0.106072
7784	1	1	51.1184	1	0	1		1.50611	0.451165		0.818484	0.650634	0.916092	0.16785	0.0976078
7898	1	1	40.4791	1	1	1		1.65956	0.461779		0.840179	0.680152	0.928551	0.160026	0.0883725
7906	1	1	40.9665	1	1	1		1.67144	0.461387		0.841768	0.682899	0.929285	0.15887	0.0875171
7680	1	1	47.4223	1	1	1		1.82889	0.461556		0.861629	0.715905	0.938977	0.145724	0.0773475
7884	1	1	64.9336	1	0	1		1.84304	0.497275		0.863307	0.704408	0.943625	0.1589	0.0803172
7787	1	1	58.6229	1	1	1		2.10205	0.484888		0.891102	0.759816	0.954887	0.131286	0.063785
7861	1	1	60.7775	1	1	1		2.1546	0.492481		0.896098	0.766622	0.957705	0.129476	0.0616069
7894	1	0	55.3238	1	0	1		2.20957	0.492544		0.901105	0.776291	0.959881	0.124815	0.0587755
7891	1	0	56.3066	1	0	1		2.23354	0.495437		0.903221	0.779453	0.961007	0.123768	0.0577858
7692	1	0	40.0684	1	1	1		2.25044	0.482087		0.904688	0.786767	0.960658	0.117921	0.0559697
7938	1	0	57.3415	1	0	1		2.25878	0.498695		0.905405	0.782677	0.962175	0.122728	0.0567699
7639	1	0	55.7372	1	1	1		2.63257	0.499201		0.932929	0.839449	0.973686	0.0934793	0.0407579

## Sheet: PRNT50>=40
ID	Intercept	sex (0=female, 1=male)	age (in years)	fever (0=no, 1=yes)	anosmia.or.dysgeusia (0=no, 1=yes)	hospitalized (0=no, 1=yes)		lp	SE		Pr(PRNT50>=1:40)	95% Confidence Interval		-	+		lp	Probability							covariance matrix
7772	1	1	24.0794	0	0	0		-0.750827	0.300195		0.320641	0.20764	0.459478	0.113001	0.138837		-4	0.0179862			Coef	SE	Intercept	sex	age	fever	anosmia.or.dysgeusia	hospitalized
7663	1	1	28.5886	0	0	0		-0.640855	0.281868		0.345053	0.232666	0.477916	0.112387	0.132863		-3.9	0.0198403		Intercept	-0.737183	0.456553	0.208441	-0.0211766	-0.00397253	-0.0206427	-0.032105	0.0189287
7727	1	1	28.9637	0	0	0		-0.631707	0.28065		0.347124	0.234732	0.479603	0.112391	0.132479		-3.8	0.0218813		sex	-0.600896	0.238581	-0.0211766	0.0569207	-0.000114827	-0.0101813	0.00393439	-0.00838024
7718	1	1	30.0096	0	0	0		-0.606201	0.27752		0.352926	0.240463	0.48444	0.112463	0.131513		-3.7	0.024127		age	0.0243882	0.0105021	-0.00397253	-0.000114827	0.000110295	-0.00010493	-4.51725e-05	-0.000528456
7899	1	1	30.9131	0	0	0		-0.584166	0.275141		0.357975	0.245373	0.488779	0.112601	0.130805		-3.6	0.026597		fever	0.909001	0.246205	-0.0206427	-0.0101813	-0.00010493	0.0606171	0.00510379	-0.017423
7734	1	1	31.3895	0	0	0		-0.572548	0.274011		0.360649	0.247944	0.491129	0.112705	0.13048		-3.5	0.0293122		anosmia.or.dysgeusia	0.412921	0.234924	-0.032105	0.00393439	-4.51725e-05	0.00510379	0.0551894	0.00596933
7805	1	1	35.0335	0	0	0		-0.483676	0.268309		0.381385	0.267066	0.510551	0.114319	0.129166		-3.4	0.0322955		hospitalized	1.53278	0.445056	0.0189287	-0.00838024	-0.000528456	-0.017423	0.00596933	0.198075
7834	1	1	37.0815	0	0	0		-0.433731	0.267465		0.393236	0.277286	0.52261	0.115949	0.129374		-3.3	0.0355712
7722	1	1	38.3409	0	0	0		-0.403016	0.267804		0.400588	0.283349	0.530432	0.117239	0.129844		-3.2	0.0391657
7679	1	1	22.5982	0	1	0		-0.374029	0.302335		0.407568	0.275558	0.55442	0.13201	0.146852		-3.1	0.0431073
7704	1	1	23.2526	0	1	0		-0.358071	0.298843		0.411427	0.280133	0.556671	0.131294	0.145244		-3	0.0474259
7703	1	1	23.6715	0	1	0		-0.347855	0.29667		0.413903	0.283061	0.55814	0.130842	0.144238		-2.9	0.0521536
7776	1	1	40.627	0	0	0		-0.347262	0.270078		0.414047	0.29388	0.545397	0.120167	0.131351		-2.8	0.0573242
7721	1	1	41.2786	0	0	0		-0.331371	0.271112		0.417907	0.296765	0.549836	0.121142	0.131929		-2.7	0.0629734
7720	1	1	26.4832	0	1	0		-0.279281	0.283421		0.43063	0.302634	0.568621	0.127996	0.13799		-2.6	0.0691384
7788	1	1	43.54	0	0	0		-0.276218	0.275991		0.431381	0.306367	0.565797	0.125014	0.134416		-2.5	0.0758582
7755	1	0	19.436	0	0	0		-0.263175	0.30933		0.434583	0.295366	0.584947	0.139217	0.150363		-2.4	0.0831727
7695	1	1	27.5318	0	1	0		-0.253707	0.27912		0.436911	0.309858	0.572821	0.127053	0.135909		-2.3	0.091123
7897	1	0	19.9179	0	0	0		-0.251423	0.30651		0.437473	0.298975	0.586457	0.138498	0.148983		-2.2	0.0997505
7699	1	1	28.5695	0	1	0		-0.228401	0.275232		0.443147	0.316943	0.577142	0.126203	0.133996		-2.1	0.109097
7757	1	1	29.3005	0	1	0		-0.210573	0.272721		0.44755	0.321889	0.580289	0.125662	0.132738		-2	0.119203
7668	1	1	29.7741	0	1	0		-0.199022	0.271197		0.450408	0.32507	0.582374	0.125338	0.131965		-1.9	0.130108
7909	1	0	22.0808	0	0	0		-0.198674	0.29459		0.450494	0.315168	0.593565	0.135327	0.143071		-1.8	0.141851
7648	1	0	23.436	0	0	0		-0.165622	0.287784		0.458689	0.325265	0.598311	0.133423	0.139622		-1.7	0.154465
7790	1	1	48.1177	0	0	0		-0.164576	0.291594		0.458949	0.323857	0.600356	0.135091	0.141408		-1.6	0.167982
7662	1	1	48.2902	0	0	0		-0.16037	0.292321		0.459993	0.324467	0.601706	0.135526	0.141713		-1.5	0.182426
7660	1	1	32.0986	0	1	0		-0.142333	0.264951		0.464477	0.340372	0.593142	0.124105	0.128665		-1.4	0.197816
7661	1	0	24.8816	0	0	0		-0.130367	0.281137		0.467454	0.33595	0.603641	0.131504	0.136187		-1.3	0.214165
7640	1	0	25.3854	0	0	0		-0.118081	0.278977		0.470514	0.339645	0.605567	0.130869	0.135053		-1.2	0.231475
7649	1	1	33.1472	0	1	0		-0.11676	0.262827		0.470843	0.34708	0.598299	0.123764	0.127456		-1.1	0.24974
7824	1	0	25.5086	0	0	0		-0.115076	0.278462		0.471263	0.340546	0.606043	0.130717	0.13478		-1	0.268941
7739	1	0	27.5264	0	0	0		-0.0658659	0.270763		0.483539	0.355131	0.614159	0.128409	0.13062		-0.9	0.28905
7652	1	0	28.3915	0	0	0		-0.0447662	0.267908		0.48881	0.361268	0.617827	0.127543	0.129016		-0.8	0.310026
7694	1	1	37.2813	0	1	0		-0.0159351	0.258888		0.496016	0.372068	0.620456	0.123948	0.12444		-0.7	0.331812
7802	1	0	29.8371	0	0	0		-0.00951106	0.263768		0.497622	0.371334	0.624214	0.126288	0.126592		-0.6	0.354344
7670	1	0	30.6229	0	0	0		0.00965226	0.26186		0.502413	0.376697	0.627825	0.125716	0.125412		-0.5	0.377541
7717	1	0	31.0801	0	0	0		0.020803	0.260863		0.505201	0.379779	0.629971	0.125422	0.124771		-0.4	0.401312
7702	1	0	31.2389	0	0	0		0.0246758	0.260537		0.506169	0.380842	0.630725	0.125327	0.124556		-0.3	0.425557
7908	1	0	31.5127	0	0	0		0.0313529	0.259998		0.507838	0.382667	0.632033	0.125171	0.124196		-0.2	0.450166
7756	1	0	31.8138	0	0	0		0.0386977	0.259441		0.509673	0.384662	0.633486	0.125011	0.123813		-0.1	0.475021
7690	1	0	32.5065	0	0	0		0.0555908	0.258303		0.513894	0.389198	0.636884	0.124696	0.12299		0	0.5
7706	1	1	40.293	0	1	0		0.0575132	0.260575		0.514374	0.388597	0.638357	0.125777	0.123983		0.1	0.524979
7732	1	1	42.7159	0	1	0		0.116606	0.264682		0.529118	0.400791	0.653709	0.128328	0.124591		0.2	0.549834
7741	1	1	43.0856	0	1	0		0.12562	0.265518		0.531364	0.402564	0.656116	0.1288	0.124753		0.3	0.574443
7865	1	0	35.9918	0	0	0		0.140591	0.255658		0.53509	0.410839	0.655133	0.124251	0.120043		0.4	0.598688
7744	1	0	36.2245	0	0	0		0.146266	0.255667		0.536501	0.412209	0.656418	0.124293	0.119917		0.5	0.622459
7673	1	1	43.9535	0	1	0		0.146786	0.26769		0.536631	0.406637	0.66183	0.129994	0.125199		0.6	0.645656
7763	1	0	36.5914	0	0	0		0.155213	0.255729		0.538726	0.414349	0.658461	0.124377	0.119735		0.7	0.668188
7658	1	1	44.3231	0	1	0		0.1558	0.268704		0.538871	0.408333	0.664288	0.130538	0.125416		0.8	0.689974
7643	1	1	24.7118	1	0	0		0.173598	0.28659		0.543291	0.404171	0.67597	0.13912	0.132679		0.9	0.71095
7926	1	1	25.347	1	0	0		0.189089	0.283399		0.547132	0.409418	0.67799	0.137714	0.130858		1	0.731059
7779	1	1	45.8316	0	1	0		0.192591	0.273376		0.548	0.415026	0.674456	0.132973	0.126456		1.1	0.75026
7698	1	0	39.3539	0	0	0		0.222585	0.258048		0.555418	0.429672	0.674445	0.125745	0.119027		1.2	0.768525
7803	1	0	39.4524	0	0	0		0.224989	0.25819		0.556011	0.430193	0.675034	0.125818	0.119023		1.3	0.785835
7733	1	0	39.6879	0	0	0		0.230732	0.258548		0.557428	0.431429	0.676446	0.125999	0.119017		1.4	0.802184
7880	1	0	23.9945	0	1	0		0.260921	0.264793		0.564863	0.435837	0.685662	0.129025	0.120799		1.5	0.817574
7665	1	1	28.3066	1	0	0		0.261268	0.270211		0.564948	0.433313	0.688021	0.131635	0.123073		1.6	0.832018
7881	1	0	41.2457	0	0	0		0.268724	0.261488		0.56678	0.439352	0.685947	0.127428	0.119168		1.7	0.845535
7809	1	1	28.7009	1	0	0		0.270883	0.268677		0.56731	0.436415	0.689437	0.130894	0.122128		1.8	0.858149
7738	1	1	49.0897	0	1	0		0.272049	0.286209		0.567596	0.428268	0.696993	0.139328	0.129397		1.9	0.869892
7664	1	1	29.7413	1	0	0		0.296257	0.264897		0.573527	0.444494	0.69327	0.129033	0.119743		2	0.880797
7644	1	0	26.7871	0	1	0		0.329027	0.251629		0.581523	0.459051	0.694707	0.122472	0.113185		2.1	0.890903
7775	1	1	31.2772	1	0	0		0.333715	0.260056		0.582663	0.456115	0.699186	0.126548	0.116523		2.2	0.90025
7672	1	0	27.0335	0	1	0		0.335037	0.250599		0.582984	0.461045	0.695553	0.121939	0.112569		2.3	0.908877
7678	1	0	27.1567	0	1	0		0.338041	0.250092		0.583715	0.462038	0.695979	0.121676	0.112264		2.4	0.916827
7796	1	1	32.4928	1	0	0		0.363362	0.256879		0.589854	0.465027	0.704088	0.124827	0.114235		2.5	0.924142
7773	1	0	29.7604	0	1	0		0.401541	0.240769		0.599058	0.482416	0.705462	0.116642	0.106405		2.6	0.930862
7650	1	0	29.9877	0	1	0		0.407083	0.240085		0.600388	0.484134	0.706335	0.116254	0.105947		2.7	0.937027
7683	1	1	34.4394	1	0	0		0.410836	0.253052		0.601288	0.478726	0.712349	0.122562	0.11106		2.8	0.942676
7770	1	1	34.4476	1	0	0		0.411036	0.25304		0.601336	0.478782	0.712385	0.122554	0.111048		2.9	0.947846
7781	1	1	34.4778	1	0	0		0.411771	0.252993		0.601512	0.478988	0.712516	0.122524	0.111004		3	0.952574
7723	1	0	30.7324	0	1	0		0.425244	0.238001		0.604738	0.489692	0.709246	0.115045	0.104509		3.1	0.956893
7669	1	0	31.3018	0	1	0		0.439133	0.236569		0.608052	0.493865	0.711526	0.114188	0.103474		3.2	0.960834
7850	1	1	35.9863	1	0	0		0.448562	0.25116		0.610297	0.489074	0.719268	0.121223	0.108971		3.3	0.964429
7749	1	1	56.9747	0	1	0		0.46435	0.330133		0.614046	0.454449	0.752392	0.159596	0.138346		3.4	0.967705
7817	1	0	32.4983	0	1	0		0.468312	0.23403		0.614984	0.502403	0.716468	0.112581	0.101484		3.5	0.970688
7793	1	1	57.8782	0	1	0		0.486384	0.336103		0.619254	0.457012	0.758623	0.162242	0.139369		3.6	0.973403
7887	1	0	50.6366	0	0	0		0.497749	0.298217		0.62193	0.478325	0.74692	0.143606	0.12499		3.7	0.975873
7659	1	0	33.8973	0	1	0		0.502432	0.231891		0.623031	0.511979	0.722508	0.111052	0.0994778		3.8	0.978119
7762	1	1	38.8693	1	0	0		0.518872	0.250422		0.626884	0.507011	0.732961	0.119873	0.106077		3.9	0.98016
7750	1	0	34.5763	0	1	0		0.518991	0.231183		0.626912	0.516462	0.72554	0.11045	0.0986279		4	0.982014
7798	1	0	34.7105	0	1	0		0.522263	0.231069		0.627677	0.517335	0.726146	0.110342	0.0984696
7847	1	0	51.9945	0	0	0		0.530868	0.305804		0.629686	0.48288	0.755884	0.146806	0.126198
7747	1	1	39.6934	1	0	0		0.53897	0.250883		0.631573	0.511808	0.737052	0.119765	0.105479
7867	1	1	40.052	1	0	0		0.547717	0.251176		0.633606	0.513849	0.738854	0.119757	0.105249
7836	1	1	23.6112	1	1	0		0.559677	0.304004		0.636378	0.490958	0.760519	0.145419	0.124141
7771	1	1	40.7529	1	0	0		0.56481	0.251912		0.637565	0.517758	0.742415	0.119806	0.10485
7736	1	0	37.2567	0	1	0		0.58436	0.230529		0.64207	0.533082	0.738116	0.108988	0.0960456
7713	1	0	37.7714	0	1	0		0.596913	0.230797		0.64495	0.536075	0.740636	0.108875	0.0956859
7768	1	1	25.4401	1	1	0		0.60428	0.294641		0.646635	0.506696	0.765267	0.139939	0.118632
7782	1	1	25.922	1	1	0		0.616032	0.292334		0.649316	0.510763	0.766563	0.138553	0.117248
7677	1	1	26.1985	1	1	0		0.622776	0.291042		0.65085	0.513081	0.767316	0.137769	0.116466
7701	1	0	38.8474	0	1	0		0.623154	0.231763		0.650936	0.542125	0.746003	0.108811	0.0950678
7647	1	1	43.384	1	0	0		0.628977	0.256545		0.652258	0.531496	0.756172	0.120762	0.103914
7789	1	1	26.4723	1	1	0		0.629453	0.289785		0.652365	0.515364	0.768068	0.137002	0.115702
7863	1	0	39.6851	0	1	0		0.643586	0.232892		0.655564	0.546643	0.75027	0.10892	0.0947067
7832	1	1	29.6454	1	1	0		0.706841	0.27699		0.669703	0.540894	0.777255	0.128809	0.107552
7740	1	0	42.5927	0	1	0		0.714497	0.239293		0.671394	0.561065	0.765578	0.11033	0.0941844
7826	1	1	30.1328	1	1	0		0.718726	0.27533		0.672326	0.544651	0.778746	0.127676	0.106419
7752	1	0	42.7789	0	1	0		0.719038	0.239829		0.672395	0.561924	0.766581	0.110471	0.0941855
7651	1	1	48.1807	1	0	0		0.74596	0.272102		0.678298	0.552961	0.782327	0.125337	0.104029
7764	1	1	48.2519	1	0	0		0.747696	0.272396		0.678677	0.553247	0.782721	0.125429	0.104044
7666	1	1	48.282	1	0	0		0.748431	0.272521		0.678837	0.553368	0.782887	0.125468	0.104051
7769	1	0	44.2875	0	1	0		0.755828	0.24471		0.680447	0.568614	0.774773	0.111834	0.0943253
7864	1	1	48.731	1	0	0		0.759381	0.274422		0.681219	0.555153	0.785372	0.126066	0.104152
7778	1	0	44.6543	0	1	0		0.764776	0.246036		0.68239	0.57017	0.776781	0.11222	0.0943916
7754	1	0	44.6626	0	1	0		0.764976	0.246066		0.682433	0.570205	0.776826	0.112229	0.0943932
7638	1	1	32.5859	1	1	0		0.778553	0.268302		0.685368	0.562836	0.786579	0.122532	0.101211
7656	1	1	49.8453	1	0	0		0.786557	0.279427		0.687092	0.559437	0.79154	0.127654	0.104449
7693	1	0	25.347	1	0	0		0.789985	0.303201		0.687828	0.548772	0.799674	0.139056	0.111846
7807	1	0	45.9521	0	1	0		0.796425	0.251147		0.689209	0.575463	0.783923	0.113746	0.0947133
7758	1	1	33.6591	1	1	0		0.804727	0.265955		0.690985	0.570393	0.790178	0.120592	0.0991933
7686	1	0	26.1164	1	0	0		0.808748	0.30004		0.691843	0.554945	0.80168	0.136898	0.109837
7852	1	0	46.4942	0	1	0		0.809646	0.253468		0.692034	0.57758	0.786918	0.114454	0.0948835
7916	1	1	33.9959	1	1	0		0.81294	0.265313		0.692736	0.572712	0.791329	0.120023	0.0985931
7681	1	1	34.0205	1	1	0		0.813541	0.265268		0.692864	0.572881	0.791413	0.119982	0.0985498
7838	1	0	26.9103	1	0	0		0.828111	0.296973		0.695955	0.561203	0.803794	0.134753	0.107839
7711	1	1	52.0465	1	0	0		0.840241	0.29045		0.698516	0.567328	0.803691	0.131188	0.105175
7642	1	1	35.6304	1	1	0		0.852803	0.262851		0.701155	0.583611	0.797055	0.117544	0.0959007
7653	1	0	28.4901	1	0	0		0.866638	0.291484		0.704046	0.5733	0.808137	0.130745	0.104091
7671	1	0	28.7529	1	0	0		0.873048	0.290653		0.70538	0.575266	0.808877	0.130114	0.103497
7748	1	0	49.2813	0	1	0		0.877619	0.267007		0.706329	0.587657	0.802335	0.118672	0.0960063
7873	1	1	37.3908	1	1	0		0.895737	0.261438		0.710073	0.594673	0.803475	0.115399	0.0934021
7822	1	0	50.0452	0	1	0		0.896248	0.271151		0.710178	0.5902	0.806543	0.119978	0.0963655
7708	1	1	37.4237	1	1	0		0.896538	0.261423		0.710237	0.594873	0.803597	0.115364	0.0933593
7691	1	1	54.9979	1	0	0		0.91222	0.307344		0.713454	0.576843	0.819744	0.136612	0.10629
7714	1	1	38.935	1	1	0		0.933395	0.26127		0.717764	0.603796	0.809303	0.113968	0.091539
7746	1	1	39.5592	1	1	0		0.948619	0.261488		0.720837	0.60733	0.811706	0.113508	0.090869
7868	1	0	52.5175	0	1	0		0.956543	0.285699		0.722429	0.597864	0.820024	0.124565	0.0975953
7684	1	1	40.011	1	1	0		0.959637	0.261749		0.723049	0.609833	0.813462	0.113216	0.0904129
7875	1	1	57.1828	1	0	0		0.965504	0.321208		0.724222	0.583203	0.831328	0.141019	0.107106
7751	1	0	52.9117	0	1	0		0.966158	0.288167		0.724353	0.599012	0.822148	0.125341	0.0977946
7866	1	0	35.0198	1	0	0		1.02589	0.278304		0.736118	0.617845	0.827978	0.118273	0.0918601
7676	1	0	18.1081	1	1	0		1.02636	0.340322		0.73621	0.588879	0.84467	0.147332	0.10846
7851	1	0	35.1431	1	0	0		1.02889	0.278212		0.736701	0.618597	0.82838	0.118104	0.0916787
7848	1	0	55.5264	0	1	0		1.02992	0.305454		0.736901	0.606168	0.83598	0.130733	0.0990786
7716	1	0	55.6057	0	1	0		1.03186	0.306002		0.737276	0.606374	0.836392	0.130902	0.0991157
7892	1	1	60.1342	1	0	0		1.03748	0.341493		0.738364	0.591013	0.846422	0.147351	0.108058
7674	1	0	55.8877	0	1	0		1.03874	0.30796		0.738606	0.6071	0.837853	0.131507	0.0992466
7761	1	1	43.4387	1	1	0		1.04323	0.26648		0.739474	0.627366	0.827146	0.112108	0.0876727
7687	1	0	56.3888	0	1	0		1.05096	0.311477		0.740959	0.608369	0.840433	0.132589	0.0994741
7839	1	0	36.0849	1	0	0		1.05186	0.277706		0.741132	0.624234	0.831482	0.116898	0.0903494
7797	1	0	56.7201	0	1	0		1.05904	0.313829		0.742506	0.609195	0.842127	0.133311	0.0996208
7654	1	1	44.1314	1	1	0		1.06013	0.268014		0.742715	0.630606	0.829973	0.112108	0.087258
7689	1	0	57.2074	0	1	0		1.07092	0.317327		0.744772	0.610392	0.844603	0.13438	0.0998307
7742	1	0	20.0493	1	1	0		1.0737	0.328609		0.745301	0.605786	0.847842	0.139515	0.102542
7712	1	1	63.0363	1	0	0		1.10826	0.362919		0.751805	0.597952	0.860516	0.153853	0.108711
7786	1	0	59.1211	0	1	0		1.11759	0.331471		0.753542	0.614889	0.854119	0.138653	0.100577
7879	1	0	39.3648	1	0	0		1.13185	0.278689		0.756181	0.64236	0.842651	0.113821	0.0864698
7657	1	0	23.2252	1	1	0		1.15116	0.311377		0.759723	0.632012	0.853392	0.12771	0.0936697
7869	1	1	49.0376	1	1	0		1.17978	0.284022		0.764908	0.650923	0.850237	0.113986	0.085329
7774	1	0	41.8782	1	0	0		1.19315	0.282299		0.767304	0.654718	0.851505	0.112586	0.0842013
7855	1	1	50.4394	1	1	0		1.21397	0.290118		0.771	0.655959	0.856018	0.115042	0.0850173
7825	1	0	25.8754	1	1	0		1.21579	0.299093		0.771322	0.652392	0.858394	0.11893	0.0870717
7818	1	1	69.7604	1	0	0		1.27225	0.416915		0.781128	0.61185	0.889869	0.169278	0.108741
7780	1	0	28.6379	1	1	0		1.28317	0.288598		0.782988	0.672059	0.863988	0.110929	0.081
7655	1	0	28.9336	1	1	0		1.29038	0.287625		0.784211	0.674066	0.86461	0.110145	0.0803994
7705	1	0	29.6756	1	1	0		1.30847	0.285319		0.787257	0.679015	0.866191	0.108243	0.0789342
7924	1	0	46.6393	1	0	0		1.30926	0.295549		0.78739	0.674803	0.868589	0.112587	0.081199
7682	1	0	47.9781	1	0	0		1.34192	0.300671		0.792805	0.679745	0.873385	0.11306	0.0805807
7728	1	0	31.9179	1	1	0		1.36316	0.279556		0.796272	0.693222	0.871141	0.10305	0.0748688
7816	1	0	31.9288	1	1	0		1.36342	0.279532		0.796316	0.693289	0.871166	0.103027	0.0748503
7641	1	0	31.9452	1	1	0		1.36382	0.279497		0.796381	0.693389	0.871203	0.102992	0.0748225
7646	1	0	49.0349	1	0	0		1.36769	0.305111		0.797007	0.68345	0.877149	0.113557	0.0801426
7645	1	1	74.1875	1	0	0		1.38022	0.454958		0.799026	0.619753	0.906526	0.179273	0.1075
7854	1	0	32.8296	1	1	0		1.38539	0.27775		0.799856	0.698676	0.873225	0.101179	0.0733696
7688	1	0	34.527	1	1	0		1.42679	0.275244		0.806401	0.708335	0.87721	0.0980657	0.0708091
7700	1	0	34.9295	1	1	0		1.43661	0.274817		0.807928	0.710531	0.878173	0.0973973	0.070245
7745	1	0	52.5065	1	0	0		1.45235	0.321966		0.810361	0.694513	0.88928	0.115848	0.0789195
7791	1	0	36.8186	1	1	0		1.48268	0.273674		0.814977	0.720366	0.882786	0.0946109	0.067809
7905	1	0	54.3381	1	0	0		1.49702	0.332129		0.81713	0.699738	0.895482	0.117392	0.0783513
7925	1	0	37.9658	1	1	0		1.51065	0.27368		0.819158	0.725964	0.885651	0.0931941	0.0664928
7823	1	0	40.5613	1	1	0		1.57395	0.275645		0.828347	0.73763	0.892277	0.090716	0.063931
7637	1	0	42.0999	1	1	0		1.61148	0.278068		0.833617	0.743924	0.896274	0.0896924	0.0626573
7675	1	0	44.2683	1	1	0		1.66436	0.283017		0.840823	0.752063	0.90195	0.0887592	0.0611269
7715	1	0	49.963	1	1	0		1.80325	0.30386		0.858544	0.769888	0.916737	0.0886554	0.0581931
7808	1	0	50.2615	1	1	0		1.81052	0.305236		0.859425	0.770699	0.917495	0.0887265	0.0580698
7859	1	0	50.6393	1	1	0		1.81974	0.307016		0.860535	0.771709	0.918451	0.0888256	0.0579167
7840	1	0	52.679	1	1	0		1.86948	0.317308		0.866398	0.776877	0.923537	0.0895213	0.0571387
7685	1	0	54.1684	1	1	0		1.90581	0.325509		0.870547	0.780367	0.927156	0.0901798	0.0566088
7709	1	0	54.7461	1	1	0		1.9199	0.328835		0.872127	0.781662	0.928536	0.0904646	0.056409
7707	1	0	57.7604	1	1	0		1.99341	0.347395		0.880103	0.787934	0.935493	0.0921695	0.0553898
7870	1	0	58.8145	1	1	0		2.01912	0.354323		0.88279	0.789953	0.937824	0.0928364	0.0550342
7753	1	0	60.3833	1	1	0		2.05738	0.365013		0.886691	0.792811	0.941188	0.0938802	0.0544974
7871	1	0	35.3155	0	1	1		2.0698	0.513566		0.887933	0.743304	0.955908	0.144629	0.0679751
7885	1	1	40.6735	1	0	1		2.09566	0.452493		0.89048	0.770081	0.951779	0.120399	0.0612989
7804	1	1	43.8193	1	0	1		2.17238	0.452068		0.897741	0.783524	0.955145	0.114217	0.0574037
7667	1	1	30.5955	1	1	1		2.26279	0.488787		0.905748	0.786637	0.96161	0.119111	0.0558618
7719	1	0	23.6632	1	0	1		2.2817	0.522146		0.90735	0.778733	0.964604	0.128618	0.0572534
7886	1	1	48.512	1	0	1		2.28682	0.455903		0.90778	0.801111	0.96009	0.106669	0.05231
7907	1	0	26.1081	1	0	1		2.34133	0.513358		0.912243	0.791691	0.966023	0.120552	0.0537806
7784	1	1	51.1184	1	0	1		2.35039	0.460305		0.912965	0.80972	0.962766	0.103245	0.0498008
7898	1	1	40.4791	1	1	1		2.50384	0.471363		0.92441	0.8292	0.968559	0.0952106	0.044149
7906	1	1	40.9665	1	1	1		2.51572	0.471079		0.925237	0.830955	0.968903	0.0942821	0.0436658
7680	1	1	47.4223	1	1	1		2.67317	0.472564		0.935425	0.851567	0.973387	0.0838578	0.0379626
7884	1	1	64.9336	1	0	1		2.68732	0.508211		0.936274	0.844385	0.975479	0.0918893	0.0392053
7787	1	1	58.6229	1	1	1		2.94633	0.497553		0.95009	0.877732	0.980574	0.0723578	0.0304844
7861	1	1	60.7775	1	1	1		2.99888	0.505368		0.952523	0.881672	0.981826	0.0708516	0.0293022
7894	1	0	55.3238	1	0	1		3.05385	0.506762		0.954948	0.887013	0.982827	0.0679348	0.0278788
7891	1	0	56.3066	1	0	1		3.07782	0.50976		0.955968	0.888814	0.983324	0.0671541	0.0273553
7692	1	0	40.0684	1	1	1		3.09472	0.496324		0.956674	0.893016	0.983168	0.0636586	0.0264939
7938	1	0	57.3415	1	0	1		3.10306	0.513122		0.957019	0.890644	0.983838	0.0663746	0.026819
7639	1	0	55.7372	1	1	1		3.47685	0.515901		0.970022	0.921701	0.988882	0.048321	0.0188602

## Sheet: PRNT50>=20
ID	Intercept	sex (0=female, 1=male)	age (in years)	fever (0=no, 1=yes)	anosmia.or.dysgeusia (0=no, 1=yes)	hospitalized (0=no, 1=yes)		lp	SE		Pr(PRNT50>=1:20)	95% Confidence Interval		-	+		lp	Probability							covariance matrix
7772	1	1	24.0794	0	0	0		0.355188	0.309424		0.587875	0.437508	0.723454	0.150367	0.135579		-4	0.0179862			Coef	SE	Intercept	sex	age	fever	anosmia.or.dysgeusia	hospitalized
7663	1	1	28.5886	0	0	0		0.46516	0.292622		0.614238	0.472932	0.738599	0.141306	0.124361		-3.9	0.0198403		Intercept	0.368832	0.464997	0.216222	-0.0237288	-0.0039113	-0.0176504	-0.0301043	0.0208929
7727	1	1	28.9637	0	0	0		0.474308	0.291528		0.616403	0.475747	0.739949	0.140655	0.123546		-3.8	0.0218813		sex	-0.600896	0.238581	-0.0237288	0.0569207	-0.000114827	-0.0101813	0.00393439	-0.00838024
7718	1	1	30.0096	0	0	0		0.499815	0.288738		0.622416	0.483478	0.743786	0.138938	0.12137		-3.7	0.024127		age	0.0243882	0.0105021	-0.0039113	-0.000114827	0.000110295	-0.00010493	-4.51725e-05	-0.000528456
7899	1	1	30.9131	0	0	0		0.521849	0.286645		0.62758	0.490007	0.747189	0.137573	0.119609		-3.6	0.026597		fever	0.909001	0.246205	-0.0176504	-0.0101813	-0.00010493	0.0606171	0.00510379	-0.017423
7734	1	1	31.3895	0	0	0		0.533467	0.285662		0.630291	0.493393	0.749015	0.136899	0.118724		-3.5	0.0293122		anosmia.or.dysgeusia	0.412921	0.234924	-0.0301043	0.00393439	-4.51725e-05	0.00510379	0.0551894	0.00596933
7805	1	1	35.0335	0	0	0		0.62234	0.280993		0.65075	0.517891	0.763702	0.13286	0.112952		-3.4	0.0322955		hospitalized	1.53278	0.445056	0.0208929	-0.00838024	-0.000528456	-0.017423	0.00596933	0.198075
7834	1	1	37.0815	0	0	0		0.672284	0.280634		0.662014	0.530522	0.772473	0.131492	0.110458		-3.3	0.0355712
7722	1	1	38.3409	0	0	0		0.702999	0.281232		0.668852	0.537874	0.778028	0.130979	0.109176		-3.2	0.0391657
7679	1	1	22.5982	0	1	0		0.731986	0.317572		0.675241	0.527359	0.794853	0.147882	0.119612		-3.1	0.0431073
7704	1	1	23.2526	0	1	0		0.747945	0.314377		0.678731	0.532894	0.796429	0.145837	0.117698		-3	0.0474259
7703	1	1	23.6715	0	1	0		0.758161	0.312394		0.680954	0.536402	0.797453	0.144552	0.116499		-2.9	0.0521536
7776	1	1	40.627	0	0	0		0.758753	0.283891		0.681083	0.55041	0.788379	0.130673	0.107296		-2.8	0.0573242
7721	1	1	41.2786	0	0	0		0.774645	0.285016		0.684525	0.553794	0.791382	0.13073	0.106857		-2.7	0.0629734
7720	1	1	26.4832	0	1	0		0.826735	0.300415		0.695664	0.559201	0.80464	0.136463	0.108976		-2.6	0.0691384
7788	1	1	43.54	0	0	0		0.829798	0.290138		0.696312	0.564913	0.801941	0.131399	0.105629		-2.5	0.0758582
7755	1	0	19.436	0	0	0		0.842841	0.325342		0.699063	0.551114	0.81465	0.14795	0.115586		-2.4	0.0831727
7695	1	1	27.5318	0	1	0		0.852308	0.296577		0.701051	0.567342	0.807462	0.133709	0.10641		-2.3	0.091123
7897	1	0	19.9179	0	0	0		0.854592	0.322753		0.70153	0.555272	0.815656	0.146257	0.114126		-2.2	0.0997505
7699	1	1	28.5695	0	1	0		0.877614	0.293138		0.706328	0.575192	0.810331	0.131136	0.104004		-2.1	0.109097
7757	1	1	29.3005	0	1	0		0.895442	0.290935		0.710012	0.580593	0.812399	0.129419	0.102387		-2	0.119203
7668	1	1	29.7741	0	1	0		0.906994	0.289608		0.712385	0.584036	0.813759	0.128349	0.101375		-1.9	0.130108
7909	1	0	22.0808	0	0	0		0.907341	0.31188		0.712456	0.573478	0.820336	0.138977	0.10788		-1.8	0.141851
7648	1	0	23.436	0	0	0		0.940393	0.30573		0.719179	0.584473	0.82341	0.134706	0.104231		-1.7	0.154465
7790	1	1	48.1177	0	0	0		0.941439	0.305937		0.71939	0.584629	0.823621	0.134762	0.104231		-1.6	0.167982
7662	1	1	48.2902	0	0	0		0.945646	0.306663		0.720239	0.585304	0.824437	0.134935	0.104199		-1.5	0.182426
7660	1	1	32.0986	0	1	0		0.963682	0.284268		0.723858	0.600253	0.820663	0.123606	0.0968047		-1.4	0.197816
7661	1	0	24.8816	0	0	0		0.975648	0.299778		0.726244	0.595821	0.826814	0.130422	0.10057		-1.3	0.214165
7640	1	0	25.3854	0	0	0		0.987934	0.297857		0.72868	0.599681	0.828031	0.128999	0.099351		-1.2	0.231475
7649	1	1	33.1472	0	1	0		0.989256	0.282517		0.728941	0.607192	0.823899	0.121749	0.0949579		-1.1	0.24974
7824	1	0	25.5086	0	0	0		0.990939	0.2974		0.729273	0.600617	0.828331	0.128657	0.0990574		-1	0.268941
7739	1	0	27.5264	0	0	0		1.04015	0.290629		0.738879	0.615506	0.833381	0.123373	0.0945024		-0.9	0.28905
7652	1	0	28.3915	0	0	0		1.06125	0.288155		0.742929	0.621628	0.835625	0.121301	0.0926963		-0.8	0.310026
7694	1	1	37.2813	0	1	0		1.09008	0.279762		0.748397	0.632219	0.837319	0.116178	0.0889222		-0.7	0.331812
7802	1	0	29.8371	0	0	0		1.0965	0.284621		0.749605	0.631498	0.83948	0.118107	0.0898751		-0.6	0.354344
7670	1	0	30.6229	0	0	0		1.11567	0.283023		0.753184	0.63667	0.841628	0.116514	0.0884441		-0.5	0.377541
7717	1	0	31.0801	0	0	0		1.12682	0.282201		0.755251	0.639618	0.842895	0.115634	0.0876442		-0.4	0.401312
7702	1	0	31.2389	0	0	0		1.13069	0.281934		0.755966	0.64063	0.843338	0.115336	0.0873721		-0.3	0.425557
7908	1	0	31.5127	0	0	0		1.13737	0.281495		0.757196	0.642363	0.844106	0.114833	0.0869096		-0.2	0.450166
7756	1	0	31.8138	0	0	0		1.14471	0.281047		0.758544	0.644251	0.844955	0.114293	0.0864107		-0.1	0.475021
7690	1	0	32.5065	0	0	0		1.16161	0.280148		0.761624	0.648515	0.846927	0.11311	0.0853021		0	0.5
7706	1	1	40.293	0	1	0		1.16353	0.281979		0.761973	0.648135	0.84764	0.113839	0.0856664		0.1	0.524979
7732	1	1	42.7159	0	1	0		1.22262	0.286297		0.772524	0.659592	0.856161	0.112932	0.0836366		0.2	0.549834
7741	1	1	43.0856	0	1	0		1.23163	0.287149		0.774105	0.66124	0.857472	0.112865	0.083367		0.3	0.574443
7865	1	0	35.9918	0	0	0		1.24661	0.278478		0.776712	0.668362	0.857224	0.108349	0.0805124		0.4	0.598688
7744	1	0	36.2245	0	0	0		1.25228	0.278538		0.777695	0.669593	0.857932	0.108101	0.0802371		0.5	0.622459
7673	1	1	43.9535	0	1	0		1.2528	0.289343		0.777784	0.665007	0.860556	0.112777	0.0827713		0.6	0.645656
7763	1	0	36.5914	0	0	0		1.26123	0.278675		0.779238	0.671511	0.859051	0.107727	0.0798137		0.7	0.668188
7658	1	1	44.3231	0	1	0		1.26182	0.290359		0.779338	0.66657	0.861871	0.112769	0.0825327		0.8	0.689974
7643	1	1	24.7118	1	0	0		1.27961	0.306303		0.782384	0.663573	0.867607	0.118811	0.0852234		0.9	0.71095
7926	1	1	25.347	1	0	0		1.2951	0.303448		0.78501	0.668265	0.86874	0.116745	0.0837299		1	0.731059
7779	1	1	45.8316	0	1	0		1.29861	0.295001		0.7856	0.672696	0.867244	0.112904	0.0816436		1.1	0.75026
7698	1	0	39.3539	0	0	0		1.3286	0.281407		0.790609	0.685043	0.867629	0.105567	0.0770202		1.2	0.768525
7803	1	0	39.4524	0	0	0		1.331	0.281559		0.791007	0.685497	0.867939	0.10551	0.0769326		1.3	0.785835
7733	1	0	39.6879	0	0	0		1.33675	0.281938		0.791954	0.686574	0.868681	0.105381	0.0767263		1.4	0.802184
7880	1	0	23.9945	0	1	0		1.36694	0.291267		0.796885	0.689129	0.874112	0.107755	0.0772278		1.5	0.817574
7665	1	1	28.3066	1	0	0		1.36728	0.291791		0.796941	0.688984	0.874264	0.107957	0.0773227		1.6	0.832018
7881	1	0	41.2457	0	0	0		1.37474	0.284971		0.798145	0.693428	0.873612	0.104717	0.0754676		1.7	0.845535
7809	1	1	28.7009	1	0	0		1.3769	0.290454		0.798492	0.6916	0.875031	0.106893	0.0765381		1.8	0.858149
7738	1	1	49.0897	0	1	0		1.37806	0.307581		0.79868	0.684646	0.878779	0.114034	0.0800996		1.9	0.869892
7664	1	1	29.7413	1	0	0		1.40227	0.287183		0.802544	0.698337	0.877089	0.104207	0.0745452		2	0.880797
7644	1	0	26.7871	0	1	0		1.43504	0.279965		0.807686	0.708128	0.879083	0.0995574	0.0713971		2.1	0.890903
7775	1	1	31.2772	1	0	0		1.43973	0.283057		0.808413	0.707845	0.880221	0.100568	0.0718077		2.2	0.90025
7672	1	0	27.0335	0	1	0		1.44105	0.279093		0.808617	0.709721	0.879539	0.0988966	0.0709219		2.3	0.908877
7678	1	0	27.1567	0	1	0		1.44406	0.278666		0.809082	0.710512	0.879769	0.0985701	0.0706866		2.4	0.916827
7796	1	1	32.4928	1	0	0		1.46938	0.280406		0.812963	0.714997	0.882775	0.0979651	0.0698121		2.5	0.924142
7773	1	0	29.7604	0	1	0		1.50756	0.270919		0.818699	0.726424	0.884786	0.0922745	0.0660875		2.6	0.930862
7650	1	0	29.9877	0	1	0		1.5131	0.270363		0.81952	0.72774	0.885239	0.0917799	0.0657195		2.7	0.937027
7683	1	1	34.4394	1	0	0		1.51685	0.277335		0.820074	0.725772	0.886997	0.0943027	0.0669228		2.8	0.942676
7770	1	1	34.4476	1	0	0		1.51705	0.277325		0.820104	0.725815	0.887015	0.0942886	0.0669114		2.9	0.947846
7781	1	1	34.4778	1	0	0		1.51779	0.27729		0.820212	0.725975	0.887082	0.0942368	0.0668696		3	0.952574
7723	1	0	30.7324	0	1	0		1.53126	0.268684		0.822191	0.73197	0.886741	0.0902207	0.0645508		3.1	0.956893
7669	1	0	31.3018	0	1	0		1.54515	0.267546		0.824212	0.73512	0.887907	0.0890918	0.0636952		3.2	0.960834
7850	1	1	35.9863	1	0	0		1.55458	0.275953		0.825574	0.733745	0.89046	0.0918283	0.0648858		3.3	0.964429
7749	1	1	56.9747	0	1	0		1.57037	0.350205		0.827836	0.707643	0.905233	0.120193	0.0773969		3.4	0.967705
7817	1	0	32.4983	0	1	0		1.57433	0.26558		0.8284	0.741502	0.890403	0.0868976	0.0620034		3.5	0.970688
7793	1	1	57.8782	0	1	0		1.5924	0.355994		0.830953	0.709849	0.908058	0.121104	0.0771043		3.6	0.973403
7887	1	0	50.6366	0	0	0		1.60376	0.320805		0.832544	0.726112	0.903134	0.106432	0.0705902		3.7	0.975873
7659	1	0	33.8973	0	1	0		1.60845	0.264022		0.833196	0.748563	0.893398	0.0846325	0.0602024		3.8	0.978119
7762	1	1	38.8693	1	0	0		1.62489	0.275922		0.835468	0.747265	0.897126	0.0882027	0.0616582		3.9	0.98016
7750	1	0	34.5763	0	1	0		1.62501	0.263558		0.835484	0.751837	0.894879	0.0836476	0.0593949		4	0.982014
7798	1	0	34.7105	0	1	0		1.62828	0.263489		0.835934	0.752472	0.895174	0.0834617	0.0592404
7847	1	0	51.9945	0	0	0		1.63688	0.328124		0.83711	0.72983	0.907207	0.10728	0.0700971
7747	1	1	39.6934	1	0	0		1.64498	0.276523		0.838212	0.750822	0.899073	0.0873903	0.0608612
7867	1	1	40.052	1	0	0		1.65373	0.276869		0.839395	0.752328	0.899925	0.0870664	0.0605305
7836	1	1	23.6112	1	1	0		1.66569	0.328592		0.841001	0.735294	0.90968	0.105706	0.0686793
7771	1	1	40.7529	1	0	0		1.67083	0.27769		0.841686	0.755202	0.901597	0.0864838	0.0599114
7736	1	0	37.2567	0	1	0		1.69038	0.263608		0.844274	0.763814	0.900881	0.0804597	0.0566071
7713	1	0	37.7714	0	1	0		1.70293	0.263962		0.845917	0.765947	0.902057	0.0799701	0.0561403
7768	1	1	25.4401	1	1	0		1.7103	0.320299		0.846875	0.746968	0.911982	0.0999061	0.0651076
7782	1	1	25.922	1	1	0		1.72205	0.318271		0.848392	0.749929	0.912605	0.098463	0.0642122
7677	1	1	26.1985	1	1	0		1.72879	0.317138		0.849258	0.751607	0.912965	0.0976509	0.0637069
7701	1	0	38.8474	0	1	0		1.72917	0.265055		0.849306	0.770239	0.904536	0.0790672	0.0552303
7647	1	1	43.384	1	0	0		1.73499	0.282471		0.85005	0.76519	0.907931	0.0848596	0.0578816
7789	1	1	26.4723	1	1	0		1.73547	0.316039		0.850111	0.753252	0.913323	0.0968585	0.0632127
7863	1	0	39.6851	0	1	0		1.7496	0.266236		0.851903	0.77343	0.906483	0.078473	0.0545801
7832	1	1	29.6454	1	1	0		1.81286	0.304987		0.859707	0.771197	0.917634	0.0885098	0.0579276
7740	1	0	42.5927	0	1	0		1.82051	0.272507		0.860628	0.783537	0.913301	0.0770905	0.0526736
7826	1	1	30.1328	1	1	0		1.82474	0.303578		0.861134	0.773771	0.918321	0.0873631	0.0571872
7752	1	0	42.7789	0	1	0		1.82505	0.27302		0.861171	0.784136	0.913739	0.0770353	0.052568
7651	1	1	48.1807	1	0	0		1.85198	0.29766		0.864359	0.780496	0.919486	0.0838624	0.0551275
7764	1	1	48.2519	1	0	0		1.85371	0.297944		0.864562	0.780699	0.919656	0.0838637	0.0550936
7666	1	1	48.282	1	0	0		1.85445	0.298064		0.864648	0.780784	0.919728	0.0838644	0.0550793
7769	1	0	44.2875	0	1	0		1.86184	0.27765		0.865512	0.788791	0.917287	0.0767212	0.0517748
7864	1	1	48.731	1	0	0		1.8654	0.299895		0.865925	0.782041	0.920794	0.0838833	0.0548697
7778	1	0	44.6543	0	1	0		1.87079	0.2789		0.86655	0.789871	0.918147	0.076679	0.0515974
7754	1	0	44.6626	0	1	0		1.87099	0.278929		0.866573	0.789895	0.918166	0.0766782	0.0515935
7638	1	1	32.5859	1	1	0		1.88457	0.297724		0.868135	0.786008	0.921876	0.0821269	0.0537406
7656	1	1	49.8453	1	0	0		1.89257	0.304706		0.869049	0.785051	0.923423	0.0839974	0.0543748
7693	1	0	25.347	1	0	0		1.896	0.32985		0.869438	0.777212	0.927069	0.092226	0.0576303
7807	1	0	45.9521	0	1	0		1.90244	0.283699		0.870168	0.793539	0.92118	0.0766287	0.0510127
7758	1	1	33.6591	1	1	0		1.91074	0.295833		0.871103	0.790991	0.923478	0.0801114	0.0523759
7686	1	0	26.1164	1	0	0		1.91476	0.327091		0.871553	0.781369	0.927966	0.0901839	0.056413
7852	1	0	46.4942	0	1	0		1.91566	0.285872		0.871654	0.795003	0.92244	0.0766507	0.0507862
7916	1	1	33.9959	1	1	0		1.91896	0.295326		0.872022	0.792509	0.923987	0.0795127	0.0519651
7681	1	1	34.0205	1	1	0		1.91956	0.29529		0.872089	0.792619	0.924024	0.0794695	0.0519354
7838	1	0	26.9103	1	0	0		1.93413	0.32443		0.873705	0.785539	0.928906	0.0881661	0.0552008
7711	1	1	52.0465	1	0	0		1.94626	0.315272		0.875038	0.790563	0.928521	0.0844748	0.0534832
7642	1	1	35.6304	1	1	0		1.95882	0.293457		0.876405	0.799575	0.926491	0.0768298	0.0500859
7653	1	0	28.4901	1	0	0		1.97265	0.319716		0.877896	0.793477	0.930816	0.0844192	0.0529204
7671	1	0	28.7529	1	0	0		1.97906	0.319008		0.878581	0.794751	0.931139	0.08383	0.0525578
7748	1	0	49.2813	0	1	0		1.98363	0.298514		0.879068	0.801953	0.928821	0.0771149	0.0497532
7873	1	1	37.3908	1	1	0		2.00175	0.29256		0.880981	0.806642	0.929246	0.0743394	0.0482655
7822	1	0	50.0452	0	1	0		2.00226	0.302381		0.881035	0.803702	0.930535	0.0773323	0.0495001
7708	1	1	37.4237	1	1	0		2.00255	0.292555		0.881065	0.806768	0.929298	0.0742967	0.0482334
7691	1	1	54.9979	1	0	0		2.01824	0.331448		0.882698	0.797154	0.935104	0.0855448	0.0524056
7714	1	1	38.935	1	1	0		2.03941	0.292734		0.884873	0.812396	0.931704	0.0724777	0.0468311
7746	1	1	39.5592	1	1	0		2.05463	0.293059		0.886415	0.814609	0.932707	0.0718065	0.0462917
7868	1	0	52.5175	0	1	0		2.06256	0.315972		0.88721	0.808958	0.935948	0.0782525	0.0487375
7684	1	1	40.011	1	1	0		2.06565	0.293386		0.88752	0.816171	0.933435	0.0713489	0.0459151
7875	1	1	57.1828	1	0	0		2.07152	0.34473		0.888104	0.801524	0.939754	0.0865798	0.0516505
7751	1	0	52.9117	0	1	0		2.07217	0.318281		0.888169	0.809743	0.93679	0.078426	0.0486215
7866	1	0	35.0198	1	0	0		2.1319	0.309044		0.893966	0.821446	0.939211	0.0725192	0.0452453
7676	1	0	18.1081	1	1	0		2.13238	0.368516		0.894011	0.80378	0.94556	0.090231	0.051549
7851	1	0	35.1431	1	0	0		2.13491	0.308985		0.89425	0.821903	0.939376	0.0723466	0.0451256
7848	1	0	55.5264	0	1	0		2.13594	0.334492		0.894348	0.814623	0.942217	0.0797245	0.0478697
7716	1	0	55.6057	0	1	0		2.13788	0.335008		0.89453	0.814763	0.942377	0.0797674	0.047847
7892	1	1	60.1342	1	0	0		2.1435	0.364203		0.89506	0.806848	0.945697	0.0882112	0.050637
7674	1	0	55.8877	0	1	0		2.14475	0.336848		0.895177	0.815256	0.942944	0.0799214	0.0477666
7761	1	1	43.4387	1	1	0		2.14925	0.298319		0.895599	0.827004	0.939001	0.0685943	0.0434022
7687	1	0	56.3888	0	1	0		2.15697	0.340156		0.896319	0.816118	0.943942	0.0802004	0.0476235
7839	1	0	36.0849	1	0	0		2.15788	0.308716		0.896403	0.825317	0.940641	0.0710858	0.0442386
7797	1	0	56.7201	0	1	0		2.16505	0.342371		0.897067	0.816679	0.944596	0.0803883	0.0475287
7654	1	1	44.1314	1	1	0		2.16614	0.299832		0.897168	0.828988	0.940128	0.0681796	0.0429607
7689	1	0	57.2074	0	1	0		2.17694	0.345666		0.898159	0.81749	0.945548	0.0806697	0.0473887
7742	1	0	20.0493	1	1	0		2.17972	0.358059		0.898413	0.814259	0.946925	0.0841547	0.0485116
7712	1	1	63.0363	1	0	0		2.21428	0.384827		0.901524	0.811535	0.951132	0.0899891	0.0496081
7786	1	0	59.1211	0	1	0		2.22361	0.359021		0.90235	0.820528	0.949179	0.0818218	0.0468294
7879	1	0	39.3648	1	0	0		2.23787	0.310249		0.903599	0.83614	0.945109	0.0674594	0.0415104
7657	1	0	23.2252	1	1	0		2.25717	0.342881		0.905268	0.829929	0.949272	0.0753382	0.0440046
7869	1	1	49.0376	1	1	0		2.2858	0.315177		0.907694	0.841315	0.948021	0.0663784	0.0403275
7774	1	0	41.8782	1	0	0		2.29916	0.313986		0.908808	0.843401	0.948562	0.0654072	0.0397546
7855	1	1	50.4394	1	1	0		2.31998	0.32095		0.910519	0.844345	0.950218	0.0661732	0.0396997
7825	1	0	25.8754	1	1	0		2.32181	0.332254		0.910667	0.841655	0.951341	0.0690126	0.0406734
7818	1	1	69.7604	1	0	0		2.37827	0.437062		0.915155	0.820777	0.962127	0.0943774	0.0469721
7780	1	0	28.6379	1	1	0		2.38918	0.323362		0.915999	0.852631	0.953601	0.0633671	0.0376026
7655	1	0	28.9336	1	1	0		2.39639	0.322551		0.916552	0.853734	0.953849	0.0628178	0.0372974
7705	1	0	29.6756	1	1	0		2.41449	0.320638		0.917925	0.856441	0.954477	0.0614846	0.0365512
7924	1	0	46.6393	1	0	0		2.41528	0.326844		0.917985	0.855037	0.955036	0.0629482	0.0370512
7682	1	0	47.9781	1	0	0		2.44793	0.33173		0.92041	0.857874	0.956815	0.0625363	0.0364052
7728	1	0	31.9179	1	1	0		2.46917	0.315955		0.921952	0.864115	0.956414	0.0578368	0.0344613
7816	1	0	31.9288	1	1	0		2.46944	0.315936		0.921971	0.864151	0.956423	0.0578204	0.0344517
7641	1	0	31.9452	1	1	0		2.46984	0.315908		0.922	0.864205	0.956438	0.0577957	0.0344373
7646	1	0	49.0349	1	0	0		2.4737	0.335952		0.922278	0.859994	0.9582	0.0622839	0.0359227
7645	1	1	74.1875	1	0	0		2.48623	0.474061		0.923171	0.825933	0.968182	0.097238	0.045011
7854	1	0	32.8296	1	1	0		2.49141	0.314536		0.923537	0.867026	0.957217	0.056511	0.0336801
7688	1	0	34.527	1	1	0		2.53281	0.312658		0.92641	0.872138	0.958736	0.054272	0.0323258
7700	1	0	34.9295	1	1	0		2.54262	0.312361		0.927076	0.873293	0.959099	0.0537832	0.0320231
7745	1	0	52.5065	1	0	0		2.55837	0.351935		0.928134	0.866294	0.962607	0.0618403	0.0344732
7791	1	0	36.8186	1	1	0		2.58869	0.311727		0.93013	0.878437	0.960822	0.0516937	0.0306918
7905	1	0	54.3381	1	0	0		2.60304	0.361567		0.931057	0.869253	0.964828	0.0618041	0.0337714
7925	1	0	37.9658	1	1	0		2.61667	0.311958		0.931927	0.881345	0.961878	0.0505814	0.0299517
7823	1	0	40.5613	1	1	0		2.67997	0.31419		0.935834	0.88737	0.964284	0.0484639	0.0284495
7637	1	0	42.0999	1	1	0		2.71749	0.316615		0.938051	0.890604	0.965712	0.0474467	0.0276606
7675	1	0	44.2683	1	1	0		2.77038	0.321384		0.941054	0.894774	0.967714	0.0462796	0.0266597
7715	1	0	49.963	1	1	0		2.90926	0.340906		0.948302	0.903879	0.972813	0.0444236	0.0245102
7808	1	0	50.2615	1	1	0		2.91654	0.342187		0.948658	0.904292	0.97307	0.0443658	0.0244123
7859	1	0	50.6393	1	1	0		2.92575	0.343843		0.949105	0.904808	0.973395	0.0442974	0.0242899
7840	1	0	52.679	1	1	0		2.9755	0.353416		0.951455	0.907443	0.975113	0.0440122	0.0236578
7685	1	0	54.1684	1	1	0		3.01182	0.36105		0.953105	0.909221	0.976327	0.0438841	0.0232221
7709	1	0	54.7461	1	1	0		3.02591	0.364149		0.953731	0.909881	0.976789	0.0438504	0.0230579
7707	1	0	57.7604	1	1	0		3.09943	0.381476		0.956869	0.913072	0.979105	0.0437973	0.0222358
7870	1	0	58.8145	1	1	0		3.12513	0.387963		0.957918	0.914098	0.979877	0.04382	0.0219589
7753	1	0	60.3833	1	1	0		3.16339	0.397991		0.959433	0.915547	0.980987	0.0438859	0.0215542
7871	1	0	35.3155	0	1	1		3.17582	0.532716		0.959914	0.893946	0.985513	0.0659683	0.0255994
7885	1	1	40.6735	1	0	1		3.20167	0.471509		0.960897	0.906997	0.984107	0.0538997	0.0232095
7804	1	1	43.8193	1	0	1		3.27839	0.47151		0.96368	0.91327	0.985263	0.05041	0.021583
7667	1	1	30.5955	1	1	1		3.36881	0.509167		0.966715	0.914577	0.987467	0.0521387	0.0207516
7719	1	0	23.6632	1	0	1		3.38772	0.541507		0.967318	0.911037	0.988446	0.0562813	0.0211271
7886	1	1	48.512	1	0	1		3.39284	0.475793		0.96748	0.92131	0.986944	0.0461698	0.0194644
7907	1	0	26.1081	1	0	1		3.44735	0.533318		0.969152	0.916983	0.988933	0.052169	0.019781
7784	1	1	51.1184	1	0	1		3.4564	0.480345		0.969422	0.925182	0.987846	0.0442398	0.0184246
7898	1	1	40.4791	1	1	1		3.60985	0.493692		0.973657	0.93353	0.989824	0.0401272	0.016167
7906	1	1	40.9665	1	1	1		3.62174	0.493481		0.97396	0.934289	0.989939	0.0396713	0.0159788
7680	1	1	47.4223	1	1	1		3.77918	0.495697		0.977669	0.943086	0.991429	0.0345826	0.0137601
7884	1	1	64.9336	1	0	1		3.79333	0.528035		0.977976	0.940385	0.992063	0.0375905	0.0140877
7787	1	1	58.6229	1	1	1		4.05234	0.520893		0.982915	0.953972	0.993777	0.028943	0.0108618
7861	1	1	60.7775	1	1	1		4.10489	0.528612		0.983776	0.955588	0.994182	0.028188	0.0104063
7894	1	0	55.3238	1	0	1		4.15986	0.530356		0.98463	0.957725	0.99451	0.0269053	0.00988002
7891	1	0	56.3066	1	0	1		4.18383	0.533334		0.984989	0.958453	0.994671	0.0265357	0.0096818
7692	1	0	40.0684	1	1	1		4.20073	0.522437		0.985237	0.95995	0.994647	0.0252865	0.00941025
7938	1	0	57.3415	1	0	1		4.20907	0.536667		0.985357	0.959192	0.994836	0.0261658	0.00947895
7639	1	0	55.7372	1	1	1		4.58286	0.54284		0.989878	0.971221	0.996484	0.0186572	0.00660579
